# Supplementary material for: Genetically predicted sex hormone binding globulin and ischemic heart disease in men and women: a univariable and multivariable Mendelian randomization study
Source: PubMed Central journal article supplement (PMC8632960; doi:10.1038/s41598-021-02510-w), 2021-11-30

## **Supplementary Tables**

**Supplementary Table S1.** Data sources for summary statistics of SHBG, testosterone and ischemic heart disease used in the analysis

**Supplementary Table S2.** Genetic predictors for SHBG in men

**Supplementary Table S3.** Genetic predictors for SHBG in women

**Supplementary Table S4.** Associations of genetic predictors for SHBG with potential confounders in men

**Supplementary Table S5.** Associations of genetic predictors for SHBG with potential confounders in women

**Supplementary Table S6.** Sex-specific associations of genetic predictors for SHBG with LDL-cholesterol and lipoprotein (a)

**Supplementary Table S7.** Sex-specific associations of genetically predicted SHBG with ischemic heart disease in the UK Biobank excluding genetic variants related to BMI in univariable MR

**Supplemental Table S8.** Sex-specific associations of genetically predicted SHBG with ischemic heart disease in the UK Biobank using non-overlapping samples in the UK Biobank

## **Supplementary Figures**

**Supplementary Figure S1.** Flow chart of the study design

**Supplementary Figure S2.** Scatter plot on the genetic association with sex hormone binding globulin and with ischemic heart disease in men and women in the UK Biobank

**Supplementary Figure S3.** Leave-one-out analysis on the sex-specific association of genetically predicted sex hormone binding globulin with ischemic heart disease in the UK Biobank

**Supplementary Table 1.** Data sources for summary statistics of SHBG, testosterone and ischemic heart disease used in the analysis

| Phenotype    | Ancestry  | Sample size                                                                                                                             | Source (cohort)      | PubMed ID or link                                                               |
|--------------|-----------|-----------------------------------------------------------------------------------------------------------------------------------------|----------------------|---------------------------------------------------------------------------------|
| SHBG         | Europeans | 180,726 men and<br>189,473 women                                                                                                        | UK Biobank           | 32042192                                                                        |
| Testosterone | Europeans | 178,782 men                                                                                                                             | UK Biobank           | 32042192                                                                        |
| SHBG         | Japanese  | 901 young men in the<br>discovery cohort and<br>786 men in the<br>validation cohort                                                     | Two Japanese cohorts | 30895971                                                                        |
| IHD          | Europeans | 25,409 IHD cases and<br>154,502 controls in<br>white British men;<br>12,511 IHD cases and<br>199,563 controls in<br>white British women | UK Biobank           | Accessed by application<br>via UK Biobank                                       |
| IHD          | Japanese  | 21,611 IHD cases and<br>87,736 controls in men<br>and 7,708 cases and<br>95,398 controls in<br>women                                    | Biobank Japan        | <a href="http://jenger.riken.jp/en/result">http://jenger.riken.jp/en/result</a> |

**Supplementary Table 2.** Genetic predictors for SHBG in men

| SNP                                     | Effect Allele | Association with SHBG |       | Note                                                          |
|-----------------------------------------|---------------|-----------------------|-------|---------------------------------------------------------------|
|                                         |               | Beta-coefficient      | SE    |                                                               |
| 1:1510035_GGC_G                         | G             | 0.01                  | 0.001 |                                                               |
| 1:167851935_TGTAGTGAGA<br>GGTAGCCCAGC_T | T             | 0.007                 | 0.001 |                                                               |
| 1:196914907_AGT_A                       | AGT           | 0.01                  | 0.001 |                                                               |
| 1:23747996_GA_G                         | G             | 0.008                 | 0.001 |                                                               |
| 1:25827633_CT_C                         | CT            | 0.011                 | 0.001 | Also associated with LDL-c, dropped in the main analysis      |
| 1:35734986_AAGTGCACTT<br>T_A            | A             | 0.01                  | 0.002 |                                                               |
| 1:93033928_CT_C                         | C             | 0.013                 | 0.001 |                                                               |
| 11:65227616_CAAA_C                      | CAAA          | 0.007                 | 0.001 |                                                               |
| 12:93632423_CA_C                        | CA            | 0.012                 | 0.002 |                                                               |
| 13:115013423_TTCTC_T                    | TTCTC         | 0.009                 | 0.001 |                                                               |
| 14:25948829_AAC_A                       | AAC           | 0.012                 | 0.001 | Also associated with BMI, and dropped in sensitivity analysis |
| 16:1786202_TGTGTGACCAT<br>CC_T          | T             | 0.009                 | 0.002 |                                                               |
| 17:16062400_TA_T                        | T             | 0.006                 | 0.001 |                                                               |
| 17:67080811_CT_C                        | C             | 0.008                 | 0.001 |                                                               |
| 17:8567107_CA_C                         | CA            | 0.043                 | 0.008 |                                                               |
| 19:7223973_TTTG_T                       | TTTG          | 0.011                 | 0.001 |                                                               |
| 2:111925731_CTTATGTT_C                  | CTTATGTT      | 0.016                 | 0.003 |                                                               |
| 2:191559843_GT_G                        | GT            | 0.01                  | 0.001 |                                                               |
| 3:49562992_CT_C                         | CT            | 0.01                  | 0.001 |                                                               |
| 4:128987952_ATT_A                       | A             | 0.006                 | 0.001 |                                                               |
| 5:36206855_GAT_G                        | G             | 0.02                  | 0.004 |                                                               |
| 6:27223966_CTCTA_C                      | C             | 0.013                 | 0.002 |                                                               |
| 6:28419903_GGT_G                        | G             | 0.007                 | 0.001 |                                                               |
| 7:74298343_TGAGA_T                      | T             | 0.008                 | 0.001 |                                                               |
| 8:81430449_AT_A                         | A             | 0.022                 | 0.002 |                                                               |
| 8:81457499_CA_C                         | C             | 0.014                 | 0.002 |                                                               |
| 9:112204335_AT_A                        | AT            | 0.01                  | 0.002 |                                                               |
| 9:123780856_AAAGGAAGG<br>_A             | AAAGGAAG<br>G | 0.008                 | 0.001 |                                                               |
| 9:125949547_TA_T                        | TA            | 0.016                 | 0.004 |                                                               |
| 9:19084633_CT_C                         | C             | 0.009                 | 0.001 |                                                               |
| rs10027275                              | G             | 0.013                 | 0.001 |                                                               |
| rs1005421                               | C             | 0.006                 | 0.001 |                                                               |
| rs10069690                              | C             | 0.007                 | 0.001 |                                                               |
| rs10083137                              | A             | 0.02                  | 0.003 |                                                               |
| rs10107182                              | T             | 0.012                 | 0.001 | Also associated with LDL-c, dropped in the main analysis      |
| rs10116426                              | C             | 0.009                 | 0.001 |                                                               |
| rs10153800                              | A             | 0.007                 | 0.001 |                                                               |
| rs1037169                               | T             | 0.012                 | 0.001 |                                                               |

|             |   |       |       |
|-------------|---|-------|-------|
| rs10411958  | C | 0.007 | 0.001 |
| rs10421262  | T | 0.011 | 0.001 |
| rs1058319   | T | 0.009 | 0.002 |
| rs10649697  | T | 0.009 | 0.001 |
| rs10657979  | C | 0.016 | 0.001 |
| rs10822153  | A | 0.064 | 0.001 |
| rs10864086  | C | 0.015 | 0.001 |
| rs10868080  | T | 0.021 | 0.001 |
| rs10871794  | A | 0.006 | 0.001 |
| rs10895277  | A | 0.01  | 0.001 |
| rs11111274  | G | 0.007 | 0.001 |
| rs111643014 | A | 0.024 | 0.004 |
| rs111767734 | T | 0.032 | 0.006 |
| rs111917063 | C | 0.019 | 0.004 |
| rs111981233 | G | 0.026 | 0.002 |
| rs112352679 | T | 0.01  | 0.002 |
| rs112965849 | A | 0.009 | 0.002 |
| rs11398692  | C | 0.006 | 0.001 |
| rs114165349 | G | 0.087 | 0.004 |
| rs11419346  | C | 0.006 | 0.002 |
| rs114949263 | C | 0.019 | 0.002 |
| rs11539938  | C | 0.01  | 0.001 |
| rs11601507  | A | 0.016 | 0.002 |
| rs11621792  | C | 0.013 | 0.001 |
| rs116338429 | T | 0.01  | 0.002 |
| rs11641834  | C | 0.012 | 0.001 |
| rs116483731 | A | 0.05  | 0.007 |
| rs11655704  | C | 0.031 | 0.001 |
| rs11666245  | G | 0.016 | 0.003 |
| rs11732763  | A | 0.012 | 0.002 |
| rs11734408  | G | 0.008 | 0.001 |
| rs11739158  | T | 0.008 | 0.001 |
| rs11743810  | T | 0.009 | 0.001 |
| rs11751920  | C | 0.023 | 0.004 |
| rs11856926  | G | 0.012 | 0.001 |
| rs11867902  | G | 0.021 | 0.004 |
| rs11994858  | G | 0.011 | 0.001 |
| rs12059956  | G | 0.008 | 0.001 |
| rs1229492   | T | 0.011 | 0.001 |
| rs12364060  | T | 0.008 | 0.001 |
| rs12454712  | C | 0.006 | 0.001 |
| rs12536766  | T | 0.005 | 0.001 |
| rs12543287  | C | 0.011 | 0.001 |

|             |      |       |       |                                                                               |
|-------------|------|-------|-------|-------------------------------------------------------------------------------|
| rs1260326   | C    | 0.038 | 0.001 | Also associated with alcohol drinking and LDL-c, dropped in the main analysis |
| rs12690320  | G    | 0.005 | 0.001 |                                                                               |
| rs12694450  | T    | 0.007 | 0.001 |                                                                               |
| rs12696304  | G    | 0.008 | 0.001 |                                                                               |
| rs12705095  | G    | 0.017 | 0.002 |                                                                               |
| rs12797706  | A    | 0.012 | 0.001 |                                                                               |
| rs12818938  | T    | 0.009 | 0.002 |                                                                               |
| rs12928099  | A    | 0.009 | 0.001 |                                                                               |
| rs12950562  | T    | 0.011 | 0.001 |                                                                               |
| rs13042148  | C    | 0.012 | 0.002 |                                                                               |
| rs13108218  | A    | 0.023 | 0.001 |                                                                               |
| rs13280055  | G    | 0.008 | 0.002 |                                                                               |
| rs13315174  | G    | 0.007 | 0.001 |                                                                               |
| rs13379043  | C    | 0.008 | 0.001 |                                                                               |
| rs13389219  | T    | 0.011 | 0.001 |                                                                               |
| rs1349852   | C    | 0.02  | 0.001 |                                                                               |
| rs1351394   | T    | 0.007 | 0.001 |                                                                               |
| rs138529890 | A    | 0.025 | 0.003 |                                                                               |
| rs139974673 | T    | 0.074 | 0.004 |                                                                               |
| rs140386498 | T    | 0.032 | 0.005 |                                                                               |
| rs140584594 | A    | 0.012 | 0.001 |                                                                               |
| rs141811210 | GTAA | 0.007 | 0.001 | Also associated with LDL-c, dropped in the main analysis                      |
| rs1418334   | G    | 0.04  | 0.001 |                                                                               |
| rs142627977 | C    | 0.012 | 0.001 |                                                                               |
| rs142740991 | C    | 0.008 | 0.001 |                                                                               |
| rs143709973 | A    | 0.014 | 0.003 |                                                                               |
| rs144647926 | A    | 0.012 | 0.002 |                                                                               |
| rs144794875 | G    | 0.01  | 0.002 |                                                                               |
| rs148082013 | G    | 0.054 | 0.01  |                                                                               |
| rs148427769 | G    | 0.014 | 0.003 |                                                                               |
| rs148911629 | G    | 0.044 | 0.006 |                                                                               |
| rs149624078 | C    | 0.098 | 0.005 |                                                                               |
| rs149663666 | T    | 0.047 | 0.007 |                                                                               |
| rs149675684 | G    | 0.079 | 0.013 |                                                                               |
| rs1567353   | C    | 0.006 | 0.001 |                                                                               |
| rs1570516   | T    | 0.006 | 0.001 |                                                                               |
| rs157935    | G    | 0.012 | 0.001 |                                                                               |
| rs1640267   | C    | 0.017 | 0.001 |                                                                               |
| rs17036326  | G    | 0.017 | 0.002 |                                                                               |
| rs17050272  | A    | 0.006 | 0.001 |                                                                               |
| rs17145750  | T    | 0.011 | 0.002 |                                                                               |
| rs17185536  | T    | 0.005 | 0.001 |                                                                               |

|             |      |       |       |                                                               |
|-------------|------|-------|-------|---------------------------------------------------------------|
| rs1730865   | G    | 0.026 | 0.001 |                                                               |
| rs174528    | T    | 0.008 | 0.001 | Also associated with LDL-c, dropped in the main analysis      |
| rs17583875  | A    | 0.024 | 0.004 |                                                               |
| rs17669311  | G    | 0.01  | 0.001 |                                                               |
| rs17747324  | T    | 0.006 | 0.001 |                                                               |
| rs1782652   | T    | 0.013 | 0.001 |                                                               |
| rs1788641   | A    | 0.007 | 0.001 |                                                               |
| rs1799831   | C    | 0.009 | 0.002 |                                                               |
| rs1799941   | A    | 0.121 | 0.001 |                                                               |
| rs1801689   | A    | 0.033 | 0.004 | Also associated with LDL-c, dropped in the main analysis      |
| rs180956060 | G    | 0.013 | 0.002 |                                                               |
| rs184640919 | G    | 0.096 | 0.019 |                                                               |
| rs185073832 | C    | 0.106 | 0.017 |                                                               |
| rs1859690   | G    | 0.015 | 0.002 |                                                               |
| rs186915841 | C    | 0.094 | 0.015 |                                                               |
| rs1870927   | A    | 0.006 | 0.001 |                                                               |
| rs1871395   | A    | 0.033 | 0.002 |                                                               |
| rs187325356 | A    | 0.065 | 0.007 |                                                               |
| rs187437    | G    | 0.008 | 0.001 |                                                               |
| rs1883783   | T    | 0.006 | 0.001 |                                                               |
| rs1890426   | C    | 0.007 | 0.001 |                                                               |
| rs190712692 | A    | 0.014 | 0.003 | Also associated with LDL-c, dropped in the main analysis      |
| rs191591035 | G    | 0.102 | 0.014 |                                                               |
| rs191884522 | C    | 0.13  | 0.015 |                                                               |
| rs198384    | A    | 0.007 | 0.001 |                                                               |
| rs1991401   | G    | 0.007 | 0.001 |                                                               |
| rs199910997 | A    | 0.01  | 0.001 |                                                               |
| rs200138078 | C    | 0.007 | 0.001 | Also associated with BMI, and dropped in sensitivity analysis |
| rs2002094   | C    | 0.012 | 0.002 |                                                               |
| rs200883214 | G    | 0.006 | 0.001 |                                                               |
| rs201764793 | TTTC | 0.009 | 0.001 |                                                               |
| rs202128511 | T    | 0.013 | 0.001 |                                                               |
| rs202200760 | C    | 0.071 | 0.003 |                                                               |
| rs2106727   | G    | 0.005 | 0.001 |                                                               |
| rs2106854   | T    | 0.008 | 0.002 |                                                               |
| rs211644    | C    | 0.006 | 0.001 |                                                               |
| rs2156805   | G    | 0.005 | 0.001 |                                                               |
| rs2197771   | G    | 0.006 | 0.001 |                                                               |
| rs2216707   | C    | 0.008 | 0.002 |                                                               |
| rs2222018   | C    | 0.013 | 0.001 |                                                               |
| rs2234694   | A    | 0.013 | 0.003 |                                                               |
| rs2238799   | G    | 0.007 | 0.001 |                                                               |

|             |    |       |       |
|-------------|----|-------|-------|
| rs2239222   | G  | 0.011 | 0.001 |
| rs2247213   | G  | 0.014 | 0.001 |
| rs2259305   | G  | 0.012 | 0.001 |
| rs2275560   | G  | 0.007 | 0.002 |
| rs2277283   | C  | 0.008 | 0.001 |
| rs2283760   | C  | 0.005 | 0.001 |
| rs2287322   | G  | 0.019 | 0.001 |
| rs2288004   | G  | 0.007 | 0.001 |
| rs234051    | A  | 0.008 | 0.001 |
| rs2431752   | A  | 0.01  | 0.002 |
| rs246192    | G  | 0.009 | 0.001 |
| rs2564923   | A  | 0.008 | 0.001 |
| rs2721195   | T  | 0.011 | 0.001 |
| rs2820441   | C  | 0.007 | 0.001 |
| rs28507491  | A  | 0.014 | 0.001 |
| rs28562483  | G  | 0.011 | 0.002 |
| rs28650012  | G  | 0.007 | 0.001 |
| rs28929474  | T  | 0.138 | 0.004 |
| rs2905801   | T  | 0.014 | 0.001 |
| rs29681     | T  | 0.009 | 0.002 |
| rs3006593   | C  | 0.008 | 0.001 |
| rs329122    | G  | 0.006 | 0.001 |
| rs34006916  | G  | 0.017 | 0.003 |
| rs34255979  | T  | 0.027 | 0.002 |
| rs34372369  | A  | 0.022 | 0.003 |
| rs34390319  | C  | 0.015 | 0.002 |
| rs34651     | T  | 0.01  | 0.002 |
| rs34771269  | CT | 0.012 | 0.001 |
| rs35067979  | C  | 0.017 | 0.002 |
| rs35225944  | T  | 0.01  | 0.001 |
| rs35234337  | C  | 0.008 | 0.001 |
| rs35526088  | T  | 0.007 | 0.001 |
| rs35654957  | T  | 0.008 | 0.001 |
| rs35824797  | C  | 0.016 | 0.002 |
| rs36013981  | A  | 0.007 | 0.001 |
| rs36086195  | T  | 0.017 | 0.001 |
| rs36103835  | T  | 0.008 | 0.001 |
| rs36108764  | G  | 0.01  | 0.002 |
| rs370654105 | C  | 0.007 | 0.001 |
| rs3742366   | C  | 0.009 | 0.001 |
| rs3746575   | G  | 0.017 | 0.001 |
| rs3747647   | C  | 0.008 | 0.002 |

Also associated with LDL-c, dropped in the main analysis

|             |    |       |       |                                                                    |
|-------------|----|-------|-------|--------------------------------------------------------------------|
| rs3780190   | G  | 0.013 | 0.001 |                                                                    |
| rs3781085   | T  | 0.006 | 0.001 |                                                                    |
| rs3782735   | A  | 0.007 | 0.001 |                                                                    |
| rs3795128   | C  | 0.01  | 0.001 |                                                                    |
| rs3812275   | C  | 0.007 | 0.001 |                                                                    |
| rs3927496   | A  | 0.01  | 0.001 |                                                                    |
| rs40270     | A  | 0.014 | 0.001 |                                                                    |
| rs4077285   | G  | 0.012 | 0.002 |                                                                    |
| rs41284816  | T  | 0.02  | 0.005 |                                                                    |
| rs41412647  | C  | 0.01  | 0.001 |                                                                    |
| rs4333851   | A  | 0.008 | 0.002 |                                                                    |
| rs445       | C  | 0.014 | 0.002 |                                                                    |
| rs45490496  | A  | 0.009 | 0.001 |                                                                    |
| rs45512696  | T  | 0.021 | 0.002 |                                                                    |
| rs4645936   | G  | 0.015 | 0.003 |                                                                    |
| rs4673528   | C  | 0.006 | 0.001 |                                                                    |
| rs4675682   | T  | 0.009 | 0.001 |                                                                    |
| rs4714001   | G  | 0.005 | 0.001 |                                                                    |
| rs4715316   | T  | 0.009 | 0.001 |                                                                    |
| rs4725944   | C  | 0.009 | 0.001 |                                                                    |
| rs4762755   | T  | 0.007 | 0.001 |                                                                    |
| rs4782568   | G  | 0.015 | 0.001 |                                                                    |
| rs4809604   | T  | 0.006 | 0.001 |                                                                    |
| rs4812336   | A  | 0.008 | 0.001 |                                                                    |
| rs4841133   | G  | 0.022 | 0.002 | Also associated with LDL-c, dropped in the main analysis           |
| rs4860987   | T  | 0.03  | 0.001 | Also associated with LDL-c, dropped in the main analysis           |
| rs4979372   | C  | 0.013 | 0.001 |                                                                    |
| rs4988308   | G  | 0.005 | 0.001 |                                                                    |
| rs501470    | G  | 0.015 | 0.001 | Also associated with lipoprotein (a), dropped in the main analysis |
| rs528350911 | C  | 0.042 | 0.008 |                                                                    |
| rs540730    | T  | 0.018 | 0.001 |                                                                    |
| rs549677458 | A  | 0.1   | 0.018 |                                                                    |
| rs55646464  | G  | 0.007 | 0.001 |                                                                    |
| rs55855238  | C  | 0.009 | 0.001 |                                                                    |
| rs55962409  | C  | 0.008 | 0.001 |                                                                    |
| rs56187480  | G  | 0.013 | 0.001 |                                                                    |
| rs56196860  | A  | 0.022 | 0.004 |                                                                    |
| rs56237852  | C  | 0.007 | 0.002 |                                                                    |
| rs562609617 | GT | 0.011 | 0.001 |                                                                    |
| rs56332871  | A  | 0.03  | 0.001 |                                                                    |
| rs565471584 | T  | 0.078 | 0.012 |                                                                    |
| rs565728741 | C  | 0.012 | 0.002 |                                                                    |



|            |         |       |       |                                                               |
|------------|---------|-------|-------|---------------------------------------------------------------|
| rs5749082  | T       | 0.009 | 0.001 |                                                               |
| rs58321169 | C       | 0.008 | 0.001 |                                                               |
| rs591939   | A       | 0.009 | 0.001 |                                                               |
| rs59708846 | A       | 0.019 | 0.002 |                                                               |
| rs60005573 | GGATTAT | 0.008 | 0.002 |                                                               |
| rs60018147 | G       | 0.013 | 0.002 |                                                               |
| rs6005840  | A       | 0.017 | 0.001 |                                                               |
| rs61755050 | T       | 0.129 | 0.008 |                                                               |
| rs61929307 | G       | 0.007 | 0.001 |                                                               |
| rs62012358 | G       | 0.007 | 0.001 |                                                               |
| rs62134282 | T       | 0.007 | 0.001 |                                                               |
| rs62182125 | G       | 0.006 | 0.001 |                                                               |
| rs62195072 | C       | 0.008 | 0.001 |                                                               |
| rs62394490 | T       | 0.011 | 0.001 |                                                               |
| rs62442919 | A       | 0.007 | 0.001 |                                                               |
| rs6258     | C       | 0.61  | 0.007 |                                                               |
| rs62580766 | T       | 0.01  | 0.002 |                                                               |
| rs62618693 | T       | 0.019 | 0.003 |                                                               |
| rs631695   | T       | 0.017 | 0.001 |                                                               |
| rs6480299  | C       | 0.011 | 0.001 |                                                               |
| rs6595447  | T       | 0.008 | 0.002 |                                                               |
| rs6632893  | A       | 0.006 | 0.001 |                                                               |
| rs665731   | T       | 0.007 | 0.002 |                                                               |
| rs6736913  | A       | 0.033 | 0.004 |                                                               |
| rs6750410  | A       | 0.018 | 0.002 |                                                               |
| rs67527887 | T       | 0.007 | 0.001 |                                                               |
| rs6792725  | G       | 0.012 | 0.001 |                                                               |
| rs6831352  | T       | 0.02  | 0.001 |                                                               |
| rs687339   | C       | 0.028 | 0.001 | Also associated with BMI, and dropped in sensitivity analysis |
| rs6900473  | A       | 0.009 | 0.001 |                                                               |
| rs6939861  | G       | 0.011 | 0.001 |                                                               |
| rs6950023  | G       | 0.032 | 0.002 |                                                               |
| rs6965401  | G       | 0.014 | 0.003 |                                                               |
| rs7096937  | T       | 0.009 | 0.001 |                                                               |
| rs71115649 | A       | 0.008 | 0.001 |                                                               |
| rs71584764 | TA      | 0.01  | 0.002 |                                                               |
| rs71586027 | TATCTC  | 0.01  | 0.001 |                                                               |
| rs7175361  | A       | 0.009 | 0.002 |                                                               |
| rs7210574  | C       | 0.01  | 0.001 |                                                               |
| rs7254776  | C       | 0.005 | 0.001 | Also associated with LDL-c, dropped in the main analysis      |
| rs72663907 | T       | 0.012 | 0.002 |                                                               |
| rs72683923 | C       | 0.034 | 0.004 |                                                               |

|             |                              |       |       |                                                               |
|-------------|------------------------------|-------|-------|---------------------------------------------------------------|
| rs72708162  | T                            | 0.016 | 0.002 |                                                               |
| rs72729610  | A                            | 0.01  | 0.002 |                                                               |
| rs72753908  | C                            | 0.011 | 0.002 |                                                               |
| rs7286550   | G                            | 0.008 | 0.001 |                                                               |
| rs72948115  | C                            | 0.012 | 0.002 |                                                               |
| rs73109480  | T                            | 0.014 | 0.002 |                                                               |
| rs7314285   | G                            | 0.03  | 0.002 |                                                               |
| rs73266316  | T                            | 0.013 | 0.002 |                                                               |
| rs73547906  | C                            | 0.006 | 0.001 |                                                               |
| rs73631501  | T                            | 0.011 | 0.001 |                                                               |
| rs738409    | G                            | 0.031 | 0.001 |                                                               |
| rs73909848  | G                            | 0.014 | 0.002 |                                                               |
| rs7438888   | C                            | 0.071 | 0.009 |                                                               |
| rs749761903 | A                            | 0.008 | 0.001 |                                                               |
| rs75130744  | G                            | 0.03  | 0.002 |                                                               |
| rs75170914  | T                            | 0.012 | 0.001 |                                                               |
| rs75349541  | C                            | 0.009 | 0.002 |                                                               |
| rs753645751 | G                            | 0.009 | 0.002 |                                                               |
| rs7540115   | C                            | 0.009 | 0.002 |                                                               |
| rs754959778 | CGT                          | 0.005 | 0.001 |                                                               |
| rs757253787 | T                            | 0.008 | 0.001 |                                                               |
| rs7623513   | C                            | 0.009 | 0.002 |                                                               |
| rs762450647 | CT                           | 0.007 | 0.001 |                                                               |
| rs7631981   | G                            | 0.007 | 0.001 |                                                               |
| rs7655064   | T                            | 0.008 | 0.002 |                                                               |
| rs768159759 | A                            | 0.013 | 0.002 |                                                               |
| rs768651403 | GT                           | 0.008 | 0.001 |                                                               |
| rs76895963  | G                            | 0.055 | 0.005 | Also associated with BMI, and dropped in sensitivity analysis |
| rs7694379   | G                            | 0.021 | 0.001 |                                                               |
| rs769447487 | T                            | 0.011 | 0.001 |                                                               |
| rs771193934 | AGGCATGC<br>TGCCAAGA<br>AT   | 0.006 | 0.001 | Also associated with LDL-c, dropped in the main analysis      |
| rs771435780 | G                            | 0.012 | 0.001 |                                                               |
| rs7735249   | C                            | 0.018 | 0.002 |                                                               |
| rs773816354 | TAACAGGA<br>GTAAAAG<br>TGTCG | 0.012 | 0.001 |                                                               |
| rs775181992 | A                            | 0.01  | 0.001 |                                                               |
| rs7780562   | C                            | 0.008 | 0.002 |                                                               |
| rs778239811 | T                            | 0.006 | 0.001 |                                                               |
| rs778571122 | GTGTTTTT<br>TTGTTTTG<br>TTTT | 0.01  | 0.001 |                                                               |
| rs780309846 | AAAAAAC                      | 0.005 | 0.001 |                                                               |
| rs7808613   | C                            | 0.008 | 0.001 |                                                               |

|                  |   |       |       |
|------------------|---|-------|-------|
| rs78319058       | T | 0.025 | 0.004 |
| rs78444298       | G | 0.026 | 0.004 |
| rs78890745       | A | 0.014 | 0.002 |
| rs7892835        | G | 0.008 | 0.001 |
| rs79287178       | G | 0.04  | 0.004 |
| rs79354983       | A | 0.016 | 0.002 |
| rs79717793       | G | 0.025 | 0.002 |
| rs8030357        | G | 0.01  | 0.001 |
| rs8038032        | G | 0.011 | 0.001 |
| rs8038465        | T | 0.006 | 0.001 |
| rs8066941        | T | 0.015 | 0.001 |
| rs8176526        | C | 0.006 | 0.001 |
| rs820503         | C | 0.011 | 0.002 |
| rs856534         | A | 0.01  | 0.001 |
| rs860262         | A | 0.01  | 0.001 |
| rs864899         | A | 0.009 | 0.001 |
| rs876435         | G | 0.008 | 0.001 |
| rs904801         | A | 0.01  | 0.001 |
| rs907866         | G | 0.008 | 0.001 |
| rs9266184        | T | 0.01  | 0.001 |
| rs9379084        | G | 0.015 | 0.002 |
| rs9697210        | G | 0.019 | 0.002 |
| rs9738226        | G | 0.019 | 0.001 |
| rs9914426        | G | 0.008 | 0.001 |
| rs997907         | C | 0.008 | 0.001 |
| X:133611871_AT_A | A | 0.009 | 0.001 |

---

Genetic correlation between SHBG and bioavailable testosterone in men was -0.05 [1]

**Supplementary Table 3.** Genetic predictors for SHBG in women

| SNP                   | Effect Allele | Association with SHBG |       | Note                                                     |
|-----------------------|---------------|-----------------------|-------|----------------------------------------------------------|
|                       |               | Beta-coefficient      | SE    |                                                          |
| 1:155867257_CAA_C     | C             | 0.009                 | 0.002 |                                                          |
| 1:221048577_TGA_T     | T             | 0.009                 | 0.002 |                                                          |
| 1:23747996_GA_G       | G             | 0.011                 | 0.002 |                                                          |
| 1:57170378_AATC_A     | A             | 0.011                 | 0.002 |                                                          |
| 1:93787087_TA_T       | T             | 0.009                 | 0.002 |                                                          |
| 10:65158772_AAAG_A    | A             | 0.047                 | 0.001 |                                                          |
| 12:103483327_AT_A     | AT            | 0.026                 | 0.001 |                                                          |
| 12:12562340_GT_G      | G             | 0.01                  | 0.002 |                                                          |
| 12:26614614_CAT_C     | C             | 0.01                  | 0.002 |                                                          |
| 13:50565104_ACT_A     | A             | 0.038                 | 0.005 |                                                          |
| 15:43025006_CT_C      | CT            | 0.117                 | 0.018 |                                                          |
| 15:51052455_CT_C      | C             | 0.008                 | 0.002 |                                                          |
| 15:53094375_TTTTG_T   | TTTTG         | 0.028                 | 0.002 |                                                          |
| 17:48627860_CCT_C     | C             | 0.009                 | 0.002 |                                                          |
| 19:7223973_TTTG_T     | TTTG          | 0.018                 | 0.001 |                                                          |
| 2:191559843_GT_G      | GT            | 0.011                 | 0.002 |                                                          |
| 2:208469213_ATCTT_A   | ATCTT         | 0.012                 | 0.002 |                                                          |
| 3:122361173_TTTTTT_C  | TTTTTC        | 0.01                  | 0.002 |                                                          |
| 4:103877471_TA_T      | T             | 0.009                 | 0.001 |                                                          |
| 6:130386212_GGAGA_G   | GGAGA         | 0.009                 | 0.002 |                                                          |
| 7:130438531_CTTTTTT_C | C             | 0.01                  | 0.001 |                                                          |
| 8:59415339_TTG_T      | T             | 0.011                 | 0.001 | Also associated with LDL-c, dropped in the main analysis |
| 8:81457499_CA_C       | C             | 0.026                 | 0.002 |                                                          |
| 9:127474886_CA_C      | CA            | 0.007                 | 0.001 |                                                          |
| rs1005421             | C             | 0.009                 | 0.001 |                                                          |
| rs10095380            | G             | 0.01                  | 0.002 |                                                          |
| rs10095930            | C             | 0.011                 | 0.001 |                                                          |
| rs10108150            | A             | 0.008                 | 0.001 |                                                          |
| rs10153315            | T             | 0.009                 | 0.001 |                                                          |
| rs10189479            | A             | 0.007                 | 0.001 |                                                          |
| rs10238028            | G             | 0.019                 | 0.003 |                                                          |
| rs1033667             | T             | 0.011                 | 0.002 |                                                          |
| rs1037169             | T             | 0.015                 | 0.002 |                                                          |
| rs10461018            | T             | 0.01                  | 0.001 |                                                          |
| rs1047891             | A             | 0.014                 | 0.002 |                                                          |
| rs10486782            | A             | 0.007                 | 0.002 |                                                          |
| rs10489206            | C             | 0.009                 | 0.002 |                                                          |
| rs10511002            | A             | 0.008                 | 0.002 |                                                          |
| rs10622246            | ATTTT         | 0.01                  | 0.001 |                                                          |

|             |         |       |       |                                                          |
|-------------|---------|-------|-------|----------------------------------------------------------|
| rs10747689  | T       | 0.006 | 0.001 |                                                          |
| rs10774095  | A       | 0.007 | 0.002 |                                                          |
| rs10815276  | G       | 0.009 | 0.001 |                                                          |
| rs10857228  | T       | 0.009 | 0.002 |                                                          |
| rs10880868  | C       | 0.008 | 0.002 |                                                          |
| rs10883451  | C       | 0.009 | 0.001 |                                                          |
| rs10893876  | C       | 0.009 | 0.002 |                                                          |
| rs10939934  | A       | 0.007 | 0.001 |                                                          |
| rs10961205  | A       | 0.007 | 0.001 |                                                          |
| rs11021232  | T       | 0.013 | 0.002 |                                                          |
| rs11047237  | A       | 0.03  | 0.004 |                                                          |
| rs11054861  | A       | 0.022 | 0.004 |                                                          |
| rs11078597  | C       | 0.017 | 0.002 |                                                          |
| rs11079685  | A       | 0.008 | 0.001 |                                                          |
| rs11103377  | G       | 0.008 | 0.001 |                                                          |
| rs111270317 | CGTGT   | 0.009 | 0.002 |                                                          |
| rs111288118 | C       | 0.013 | 0.002 |                                                          |
| rs11130982  | T       | 0.007 | 0.002 |                                                          |
| rs11186719  | A       | 0.012 | 0.001 |                                                          |
| rs11188601  | C       | 0.01  | 0.001 |                                                          |
| rs112332688 | A       | 0.008 | 0.002 |                                                          |
| rs1126161   | G       | 0.007 | 0.002 |                                                          |
| rs1128249   | T       | 0.017 | 0.001 | Also associated with LDL-c, dropped in the main analysis |
| rs112966033 | TACACAC | 0.016 | 0.001 |                                                          |
| rs113408476 | A       | 0.012 | 0.002 |                                                          |
| rs11376788  | AC      | 0.008 | 0.002 |                                                          |
| rs114165349 | G       | 0.07  | 0.005 | Also associated with LDL-c, dropped in the main analysis |
| rs114816312 | T       | 0.082 | 0.008 |                                                          |
| rs114949263 | C       | 0.015 | 0.002 |                                                          |
| rs115209326 | T       | 0.076 | 0.012 |                                                          |
| rs11539938  | C       | 0.009 | 0.001 |                                                          |
| rs11556924  | T       | 0.012 | 0.001 |                                                          |
| rs11601507  | A       | 0.016 | 0.003 | Also associated with LDL-c, dropped in the main analysis |
| rs11621792  | C       | 0.025 | 0.001 | Also associated with LDL-c, dropped in the main analysis |
| rs116279971 | C       | 0.041 | 0.007 |                                                          |
| rs11637595  | C       | 0.009 | 0.002 |                                                          |
| rs11641834  | C       | 0.011 | 0.001 |                                                          |
| rs11664106  | T       | 0.006 | 0.002 |                                                          |
| rs11666245  | G       | 0.017 | 0.003 |                                                          |
| rs11668201  | T       | 0.009 | 0.002 |                                                          |
| rs11688682  | C       | 0.009 | 0.002 |                                                          |
| rs11690748  | C       | 0.007 | 0.001 |                                                          |

|             |   |       |       |                                                                               |
|-------------|---|-------|-------|-------------------------------------------------------------------------------|
| rs11720108  | T | 0.007 | 0.002 |                                                                               |
| rs11738093  | A | 0.012 | 0.002 |                                                                               |
| rs117522510 | A | 0.05  | 0.01  |                                                                               |
| rs11774700  | C | 0.006 | 0.002 |                                                                               |
| rs11780978  | A | 0.008 | 0.001 |                                                                               |
| rs11791747  | G | 0.011 | 0.002 |                                                                               |
| rs11830764  | C | 0.04  | 0.003 |                                                                               |
| rs11967262  | C | 0.009 | 0.001 |                                                                               |
| rs12012896  | A | 0.025 | 0.001 |                                                                               |
| rs12138803  | C | 0.008 | 0.002 |                                                                               |
| rs1223796   | G | 0.013 | 0.002 |                                                                               |
| rs12280075  | G | 0.008 | 0.002 |                                                                               |
| rs1229498   | T | 0.011 | 0.002 |                                                                               |
| rs12311848  | G | 0.011 | 0.002 | Also associated with LDL-c, dropped in the main analysis                      |
| rs12438742  | G | 0.008 | 0.001 |                                                                               |
| rs12454712  | C | 0.008 | 0.001 |                                                                               |
| rs12543287  | C | 0.011 | 0.001 |                                                                               |
| rs12593818  | T | 0.01  | 0.002 |                                                                               |
| rs1260326   | C | 0.034 | 0.001 | Also associated with alcohol drinking and LDL-c, dropped in the main analysis |
| rs12613243  | T | 0.015 | 0.003 |                                                                               |
| rs12624244  | A | 0.021 | 0.003 |                                                                               |
| rs12787996  | C | 0.007 | 0.002 |                                                                               |
| rs12797706  | A | 0.014 | 0.002 |                                                                               |
| rs12804411  | T | 0.015 | 0.002 |                                                                               |
| rs12864658  | T | 0.015 | 0.003 |                                                                               |
| rs12906447  | C | 0.009 | 0.001 |                                                                               |
| rs13018007  | G | 0.012 | 0.003 |                                                                               |
| rs13042148  | C | 0.014 | 0.002 |                                                                               |
| rs13108218  | A | 0.022 | 0.001 | Also associated with LDL-c, dropped in the main analysis                      |
| rs13150068  | A | 0.017 | 0.001 |                                                                               |
| rs13200245  | A | 0.008 | 0.002 |                                                                               |
| rs13237750  | C | 0.017 | 0.003 |                                                                               |
| rs1330307   | A | 0.009 | 0.001 |                                                                               |
| rs13303359  | C | 0.007 | 0.001 |                                                                               |
| rs13379043  | C | 0.01  | 0.002 |                                                                               |
| rs13394092  | C | 0.008 | 0.002 |                                                                               |
| rs138204164 | C | 0.011 | 0.002 |                                                                               |
| rs139974673 | T | 0.048 | 0.004 |                                                                               |
| rs140302625 | T | 0.067 | 0.002 |                                                                               |
| rs140312320 | G | 0.016 | 0.003 |                                                                               |
| rs140584594 | A | 0.015 | 0.002 |                                                                               |
| rs1418652   | C | 0.007 | 0.001 |                                                                               |

|             |            |       |       |                                                          |
|-------------|------------|-------|-------|----------------------------------------------------------|
| rs1433210   | C          | 0.008 | 0.002 |                                                          |
| rs143378550 | A          | 0.02  | 0.005 |                                                          |
| rs144293483 | AC         | 0.014 | 0.003 |                                                          |
| rs146104952 | CCAAAAAATA | 0.011 | 0.002 |                                                          |
| rs147153202 | G          | 0.013 | 0.002 |                                                          |
| rs148911629 | G          | 0.041 | 0.007 |                                                          |
| rs150115323 | G          | 0.005 | 0.001 |                                                          |
| rs150584036 | TAC        | 0.009 | 0.002 |                                                          |
| rs1530439   | T          | 0.012 | 0.002 |                                                          |
| rs1634791   | A          | 0.01  | 0.001 | Also associated with LDL-c, dropped in the main analysis |
| rs1650527   | C          | 0.011 | 0.002 |                                                          |
| rs1684608   | C          | 0.009 | 0.002 |                                                          |
| rs16995626  | C          | 0.017 | 0.003 |                                                          |
| rs17128091  | C          | 0.012 | 0.002 |                                                          |
| rs17202341  | G          | 0.008 | 0.001 |                                                          |
| rs1730862   | G          | 0.021 | 0.001 |                                                          |
| rs1738386   | C          | 0.009 | 0.001 |                                                          |
| rs1741344   | T          | 0.007 | 0.001 |                                                          |
| rs174537    | G          | 0.014 | 0.001 | Also associated with LDL-c, dropped in the main analysis |
| rs17492269  | G          | 0.009 | 0.002 |                                                          |
| rs17580     | A          | 0.023 | 0.003 |                                                          |
| rs17583875  | A          | 0.027 | 0.005 |                                                          |
| rs17616365  | G          | 0.026 | 0.004 |                                                          |
| rs17669311  | G          | 0.009 | 0.001 |                                                          |
| rs1782652   | T          | 0.012 | 0.001 |                                                          |
| rs17887160  | C          | 0.009 | 0.002 |                                                          |
| rs1801282   | G          | 0.02  | 0.002 |                                                          |
| rs183015141 | G          | 0.029 | 0.005 |                                                          |
| rs185044544 | T          | 0.021 | 0.005 |                                                          |
| rs1870927   | A          | 0.008 | 0.001 |                                                          |
| rs1872992   | A          | 0.006 | 0.002 |                                                          |
| rs191591035 | G          | 0.113 | 0.017 |                                                          |
| rs1962883   | C          | 0.006 | 0.001 |                                                          |
| rs198358    | C          | 0.006 | 0.002 |                                                          |
| rs199607859 | T          | 0.01  | 0.001 | Also associated with LDL-c, dropped in the main analysis |
| rs2009310   | T          | 0.006 | 0.001 |                                                          |
| rs201468966 | C          | 0.016 | 0.002 |                                                          |
| rs2018519   | C          | 0.019 | 0.002 |                                                          |
| rs201874554 | A          | 0.015 | 0.003 |                                                          |
| rs202021413 | TA         | 0.01  | 0.001 |                                                          |
| rs202200760 | C          | 0.079 | 0.004 |                                                          |
| rs2057655   | A          | 0.009 | 0.002 | Also associated with LDL-c, dropped in the main analysis |

|            |    |       |       |                                                               |
|------------|----|-------|-------|---------------------------------------------------------------|
| rs2064074  | A  | 0.008 | 0.001 |                                                               |
| rs2068888  | A  | 0.011 | 0.001 | Also associated with LDL-c, dropped in the main analysis      |
| rs2176040  | A  | 0.015 | 0.001 |                                                               |
| rs2207132  | G  | 0.023 | 0.004 | Also associated with LDL-c, dropped in the main analysis      |
| rs2239222  | G  | 0.009 | 0.002 |                                                               |
| rs2246223  | T  | 0.007 | 0.001 |                                                               |
| rs2288926  | A  | 0.005 | 0.002 |                                                               |
| rs2299055  | A  | 0.009 | 0.002 |                                                               |
| rs2364717  | T  | 0.007 | 0.001 |                                                               |
| rs2438109  | C  | 0.008 | 0.002 |                                                               |
| rs2498786  | C  | 0.013 | 0.001 |                                                               |
| rs2525570  | G  | 0.009 | 0.001 |                                                               |
| rs267733   | A  | 0.014 | 0.002 |                                                               |
| rs2723555  | T  | 0.006 | 0.001 |                                                               |
| rs275177   | C  | 0.009 | 0.002 |                                                               |
| rs28360642 | A  | 0.02  | 0.002 |                                                               |
| rs28459049 | C  | 0.007 | 0.002 | Also associated with LDL-c, dropped in the main analysis      |
| rs28636815 | G  | 0.011 | 0.001 |                                                               |
| rs28712547 | G  | 0.01  | 0.002 |                                                               |
| rs28925904 | C  | 0.028 | 0.005 |                                                               |
| rs28929470 | A  | 0.054 | 0.011 |                                                               |
| rs28929474 | T  | 0.063 | 0.005 |                                                               |
| rs2915023  | G  | 0.01  | 0.002 |                                                               |
| rs2924808  | C  | 0.007 | 0.001 |                                                               |
| rs2925979  | C  | 0.013 | 0.002 |                                                               |
| rs2970871  | T  | 0.008 | 0.001 |                                                               |
| rs2980858  | C  | 0.008 | 0.002 | Also associated with LDL-c, dropped in the main analysis      |
| rs2986669  | A  | 0.009 | 0.002 |                                                               |
| rs3001032  | C  | 0.012 | 0.002 |                                                               |
| rs3018695  | A  | 0.008 | 0.001 |                                                               |
| rs34154818 | A  | 0.009 | 0.001 |                                                               |
| rs34184867 | C  | 0.008 | 0.001 |                                                               |
| rs34255979 | T  | 0.027 | 0.002 | Also associated with LDL-c, dropped in the main analysis      |
| rs34311866 | T  | 0.01  | 0.002 |                                                               |
| rs34331968 | T  | 0.012 | 0.001 |                                                               |
| rs34385891 | AT | 0.008 | 0.001 |                                                               |
| rs34499031 | T  | 0.009 | 0.002 |                                                               |
| rs34651    | T  | 0.009 | 0.003 |                                                               |
| rs35143646 | T  | 0.008 | 0.002 |                                                               |
| rs35198068 | T  | 0.008 | 0.002 | Also associated with BMI, dropped in the sensitivity analysis |
| rs35233014 | C  | 0.014 | 0.002 |                                                               |



|             |                                            |       |       |                                                          |
|-------------|--------------------------------------------|-------|-------|----------------------------------------------------------|
| rs35475471  | CAT                                        | 0.008 | 0.002 |                                                          |
| rs35568851  | CT                                         | 0.008 | 0.001 | Also associated with LDL-c, dropped in the main analysis |
| rs35696875  | TCA                                        | 0.011 | 0.002 |                                                          |
| rs3733321   | T                                          | 0.007 | 0.001 |                                                          |
| rs3747207   | A                                          | 0.019 | 0.002 |                                                          |
| rs3747367   | A                                          | 0.007 | 0.002 |                                                          |
| rs3749228   | C                                          | 0.013 | 0.003 |                                                          |
| rs3751129   | A                                          | 0.01  | 0.002 |                                                          |
| rs3768420   | C                                          | 0.008 | 0.002 |                                                          |
| rs3782735   | A                                          | 0.011 | 0.001 |                                                          |
| rs390408    | A                                          | 0.015 | 0.002 |                                                          |
| rs40270     | A                                          | 0.019 | 0.002 |                                                          |
| rs4077285   | G                                          | 0.014 | 0.002 |                                                          |
| rs4092465   | G                                          | 0.011 | 0.001 |                                                          |
| rs4122352   | A                                          | 0.011 | 0.002 |                                                          |
| rs41280463  | G                                          | 0.01  | 0.002 |                                                          |
| rs4149056   | T                                          | 0.027 | 0.002 |                                                          |
| rs4264433   | T                                          | 0.019 | 0.001 | Also associated with LDL-c, dropped in the main analysis |
| rs4307773   | T                                          | 0.013 | 0.001 |                                                          |
| rs4327143   | A                                          | 0.008 | 0.002 |                                                          |
| rs4450871   | G                                          | 0.008 | 0.001 |                                                          |
| rs4530527   | C                                          | 0.008 | 0.001 |                                                          |
| rs4563785   | G                                          | 0.014 | 0.003 |                                                          |
| rs469721    | C                                          | 0.013 | 0.002 |                                                          |
| rs4709746   | T                                          | 0.009 | 0.002 |                                                          |
| rs4804669   | A                                          | 0.009 | 0.002 |                                                          |
| rs4810580   | T                                          | 0.01  | 0.002 |                                                          |
| rs4830411   | G                                          | 0.008 | 0.001 |                                                          |
| rs4837794   | T                                          | 0.012 | 0.002 |                                                          |
| rs4871015   | A                                          | 0.007 | 0.001 |                                                          |
| rs4876993   | T                                          | 0.008 | 0.001 |                                                          |
| rs4976033   | A                                          | 0.009 | 0.001 |                                                          |
| rs5112      | G                                          | 0.009 | 0.002 | Also associated with LDL-c, dropped in the main analysis |
| rs5117      | C                                          | 0.012 | 0.002 | Also associated with LDL-c, dropped in the main analysis |
| rs528350911 | C                                          | 0.058 | 0.01  |                                                          |
| rs528806375 | A                                          | 0.009 | 0.001 |                                                          |
| rs545206972 | C                                          | 0.69  | 0.009 |                                                          |
| rs548235873 | ATTT                                       | 0.007 | 0.002 |                                                          |
| rs549664712 | C                                          | 0.013 | 0.002 |                                                          |
| rs550767741 | ATTTTTTTTT<br>TTTTTTTTTTTT<br>TTTTTTTTTTTT | 0.022 | 0.002 |                                                          |
| rs555234816 | T                                          | 0.017 | 0.003 |                                                          |

|             |    |       |       |                                                               |
|-------------|----|-------|-------|---------------------------------------------------------------|
| rs555754    | A  | 0.016 | 0.001 | Also associated with LDL-c, dropped in the main analysis      |
| rs560436873 | A  | 0.119 | 0.018 |                                                               |
| rs56332871  | A  | 0.038 | 0.002 |                                                               |
| rs568656    | C  | 0.011 | 0.002 |                                                               |
| rs57158761  | A  | 0.007 | 0.001 |                                                               |
| rs5750131   | G  | 0.006 | 0.001 |                                                               |
| rs5753111   | T  | 0.014 | 0.002 |                                                               |
| rs5791099   | TA | 0.006 | 0.002 |                                                               |
| rs5813220   | G  | 0.013 | 0.002 |                                                               |
| rs5820605   | CT | 0.007 | 0.001 |                                                               |
| rs58321169  | C  | 0.008 | 0.002 |                                                               |
| rs58489806  | C  | 0.011 | 0.003 | Also associated with LDL-c, dropped in the main analysis      |
| rs59774409  | T  | 0.016 | 0.003 |                                                               |
| rs59837038  | T  | 0.008 | 0.002 |                                                               |
| rs60018147  | G  | 0.014 | 0.002 |                                                               |
| rs6058067   | G  | 0.009 | 0.002 |                                                               |
| rs6073431   | T  | 0.017 | 0.001 |                                                               |
| rs6088776   | T  | 0.012 | 0.002 |                                                               |
| rs6129778   | A  | 0.013 | 0.002 | Also associated with LDL-c, dropped in the main analysis      |
| rs61755050  | T  | 0.13  | 0.009 |                                                               |
| rs61830291  | C  | 0.014 | 0.002 |                                                               |
| rs62128735  | A  | 0.009 | 0.002 |                                                               |
| rs62186584  | C  | 0.007 | 0.002 |                                                               |
| rs62271373  | T  | 0.022 | 0.003 |                                                               |
| rs62303689  | C  | 0.009 | 0.002 |                                                               |
| rs62486442  | G  | 0.007 | 0.002 |                                                               |
| rs62515079  | G  | 0.031 | 0.005 |                                                               |
| rs62580766  | T  | 0.011 | 0.002 |                                                               |
| rs6531735   | G  | 0.006 | 0.001 |                                                               |
| rs6546096   | A  | 0.028 | 0.002 |                                                               |
| rs6706      | T  | 0.018 | 0.002 |                                                               |
| rs6736913   | A  | 0.034 | 0.005 |                                                               |
| rs67651018  | A  | 0.008 | 0.002 |                                                               |
| rs6772177   | C  | 0.012 | 0.002 |                                                               |
| rs67890964  | C  | 0.009 | 0.001 |                                                               |
| rs6792725   | G  | 0.017 | 0.002 |                                                               |
| rs68002561  | G  | 0.013 | 0.002 |                                                               |
| rs6803518   | T  | 0.007 | 0.002 |                                                               |
| rs6831257   | G  | 0.008 | 0.001 |                                                               |
| rs6860245   | C  | 0.011 | 0.002 |                                                               |
| rs687339    | C  | 0.036 | 0.002 | Also associated with BMI, dropped in the sensitivity analysis |
| rs6879874   | T  | 0.008 | 0.002 |                                                               |

|             |                           |       |       |                                                          |
|-------------|---------------------------|-------|-------|----------------------------------------------------------|
| rs696825    | T                         | 0.025 | 0.002 |                                                          |
| rs7139079   | A                         | 0.013 | 0.001 | Also associated with LDL-c, dropped in the main analysis |
| rs71468663  | A                         | 0.017 | 0.003 |                                                          |
| rs71531849  | CT                        | 0.011 | 0.002 |                                                          |
| rs7250869   | C                         | 0.01  | 0.002 |                                                          |
| rs7252372   | G                         | 0.007 | 0.001 |                                                          |
| rs72648854  | C                         | 0.018 | 0.004 |                                                          |
| rs72681869  | C                         | 0.059 | 0.007 |                                                          |
| rs72766607  | T                         | 0.027 | 0.005 |                                                          |
| rs72782727  | G                         | 0.009 | 0.002 |                                                          |
| rs72836346  | C                         | 0.013 | 0.003 |                                                          |
| rs72844546  | C                         | 0.01  | 0.001 |                                                          |
| rs7298820   | T                         | 0.014 | 0.002 |                                                          |
| rs73036519  | G                         | 0.012 | 0.002 |                                                          |
| rs7321688   | C                         | 0.007 | 0.002 |                                                          |
| rs73519353  | A                         | 0.075 | 0.013 |                                                          |
| rs73670309  | C                         | 0.011 | 0.002 |                                                          |
| rs740516    | C                         | 0.009 | 0.002 | Also associated with LDL-c, dropped in the main analysis |
| rs740893    | G                         | 0.009 | 0.002 |                                                          |
| rs74090351  | A                         | 0.016 | 0.003 |                                                          |
| rs7475279   | A                         | 0.021 | 0.002 |                                                          |
| rs7481219   | A                         | 0.009 | 0.002 |                                                          |
| rs7484541   | T                         | 0.014 | 0.002 |                                                          |
| rs75077113  | C                         | 0.01  | 0.002 |                                                          |
| rs75130744  | G                         | 0.026 | 0.003 |                                                          |
| rs7567544   | C                         | 0.008 | 0.001 |                                                          |
| rs764029425 | TG                        | 0.038 | 0.002 |                                                          |
| rs76491020  | C                         | 0.011 | 0.003 |                                                          |
| rs76767219  | A                         | 0.047 | 0.004 |                                                          |
| rs768159759 | A                         | 0.014 | 0.003 |                                                          |
| rs76895963  | G                         | 0.073 | 0.005 |                                                          |
| rs7696472   | A                         | 0.006 | 0.001 |                                                          |
| rs770971500 | C                         | 0.01  | 0.002 |                                                          |
| rs771193934 | AGGCATGCTG<br>CCAAGAAT    | 0.01  | 0.002 | Also associated with LDL-c, dropped in the main analysis |
| rs775181992 | A                         | 0.014 | 0.002 |                                                          |
| rs778571122 | GTGTTTTTTTT<br>GTTTTGTTTT | 0.011 | 0.001 |                                                          |
| rs78057960  | T                         | 0.009 | 0.002 |                                                          |
| rs78058190  | G                         | 0.023 | 0.004 |                                                          |
| rs781996653 | TTATTTATTG                | 0.009 | 0.001 |                                                          |
| rs784504    | C                         | 0.01  | 0.002 |                                                          |
| rs78890745  | A                         | 0.022 | 0.002 |                                                          |
| rs79237700  | T                         | 0.019 | 0.004 |                                                          |

|            |   |       |       |                                                          |
|------------|---|-------|-------|----------------------------------------------------------|
| rs79287178 | G | 0.028 | 0.004 |                                                          |
| rs79391862 | A | 0.074 | 0.006 |                                                          |
| rs799157   | T | 0.021 | 0.003 |                                                          |
| rs80126506 | A | 0.008 | 0.001 |                                                          |
| rs80235628 | G | 0.021 | 0.003 |                                                          |
| rs8027064  | A | 0.026 | 0.004 |                                                          |
| rs8107967  | G | 0.01  | 0.001 |                                                          |
| rs8176741  | G | 0.016 | 0.003 |                                                          |
| rs8178824  | C | 0.042 | 0.004 | Also associated with LDL-c, dropped in the main analysis |
| rs820504   | G | 0.013 | 0.002 |                                                          |
| rs848476   | G | 0.007 | 0.002 |                                                          |
| rs858519   | C | 0.1   | 0.001 |                                                          |
| rs868655   | C | 0.008 | 0.002 |                                                          |
| rs8756     | C | 0.009 | 0.001 |                                                          |
| rs892225   | G | 0.007 | 0.001 |                                                          |
| rs899865   | T | 0.006 | 0.002 |                                                          |
| rs921153   | A | 0.009 | 0.002 |                                                          |
| rs925098   | G | 0.01  | 0.002 |                                                          |
| rs9366291  | C | 0.008 | 0.001 |                                                          |
| rs9379084  | G | 0.015 | 0.002 |                                                          |
| rs9426829  | C | 0.014 | 0.001 |                                                          |
| rs9461793  | A | 0.009 | 0.002 |                                                          |
| rs9556403  | G | 0.007 | 0.001 |                                                          |
| rs9644032  | T | 0.006 | 0.001 |                                                          |
| rs9697210  | G | 0.016 | 0.002 |                                                          |
| rs9834503  | A | 0.008 | 0.001 |                                                          |
| rs9872754  | C | 0.009 | 0.002 |                                                          |
| rs9987289  | G | 0.022 | 0.002 | Also associated with LDL-c, dropped in the main analysis |

---

Genetic correlation between SHBG and bioavailable testosterone in women was -0.74 [1]

**Supplementary Table 4.** Associations of genetic predictors for SHBG with potential confounders in men

| SNP               | P values with potential confounders |                            |                |         |                  |
|-------------------|-------------------------------------|----------------------------|----------------|---------|------------------|
|                   | Moderate physical activity          | Vigorous physical activity | Townsend index | smoking | Alcohol drinking |
| rs3742366         | 0.865                               | 0.853                      | 0.034          | 0.00002 | 0.041            |
| rs1418334         | 0.036                               | 0.019                      | 0.077          | 0.000   | 0.358            |
| rs6831352         | 0.861                               | 0.605                      | 0.190          | 0.001   | 0.043            |
| rs329122          | 0.114                               | 0.624                      | 0.033          | 0.001   | 0.683            |
| rs200138078       | 0.168                               | 0.968                      | 0.010          | 0.001   | 0.446            |
| rs11419346        | 0.700                               | 0.630                      | 0.882          | 0.002   | 0.170            |
| rs28507491        | 0.020                               | 0.077                      | 0.037          | 0.002   | 0.799            |
| rs200883214       | 0.845                               | 0.855                      | 0.117          | 0.003   | 0.275            |
| rs12364060        | 0.367                               | 0.719                      | 0.470          | 0.004   | 0.483            |
| rs4675682         | 0.858                               | 0.159                      | 0.085          | 0.005   | 0.425            |
| rs34255979        | 0.141                               | 0.016                      | 0.115          | 0.007   | 0.807            |
| rs28929474        | 0.189                               | 0.554                      | 0.021          | 0.008   | 0.000            |
| 19:7223973_TTTG_T | 0.790                               | 0.655                      | 0.196          | 0.008   | 0.332            |
| rs11743810        | 0.510                               | 0.178                      | 0.207          | 0.008   | 0.889            |
| rs4714001         | 0.555                               | 0.729                      | 0.413          | 0.009   | 0.752            |
| rs62618693        | 0.299                               | 0.417                      | 0.296          | 0.009   | 0.920            |
| rs72753908        | 0.606                               | 0.430                      | 0.955          | 0.013   | 0.849            |
| rs11734408        | 0.905                               | 0.112                      | 0.772          | 0.013   | 0.074            |
| rs59708846        | 0.330                               | 0.178                      | 0.571          | 0.014   | 0.551            |
| rs3795128         | 0.110                               | 0.483                      | 0.059          | 0.015   | 0.006            |
| rs11751920        | 0.289                               | 0.820                      | 0.261          | 0.021   | 0.026            |
| rs6750410         | 0.211                               | 0.566                      | 0.193          | 0.023   | 0.073            |
| rs34651           | 0.171                               | 0.285                      | 0.030          | 0.023   | 0.449            |
| rs62012358        | 0.367                               | 0.121                      | 0.913          | 0.023   | 0.000            |
| rs10868080        | 0.640                               | 0.905                      | 0.072          | 0.028   | 0.100            |
| rs4988308         | 0.783                               | 0.667                      | 0.192          | 0.028   | 0.289            |
| rs62580766        | 0.029                               | 0.398                      | 0.248          | 0.029   | 0.292            |
| rs7286550         | 0.124                               | 0.029                      | 0.765          | 0.031   | 0.098            |
| rs445             | 0.179                               | 0.892                      | 0.483          | 0.032   | 0.055            |
| rs55646464        | 0.285                               | 0.686                      | 0.374          | 0.034   | 0.640            |
| rs4841133         | 0.323                               | 0.562                      | 0.818          | 0.039   | 0.725            |
| rs7540115         | 0.097                               | 0.251                      | 0.408          | 0.045   | 0.642            |
| rs112965849       | 0.955                               | 0.655                      | 0.737          | 0.045   | 0.908            |
| rs190712692       | 0.879                               | 0.293                      | 0.914          | 0.046   | 0.004            |
| rs6005840         | 0.417                               | 0.201                      | 0.259          | 0.051   | 0.330            |
| rs149624078       | 0.946                               | 0.653                      | 0.459          | 0.054   | 0.026            |
| rs34006916        | 0.834                               | 0.572                      | 0.743          | 0.054   | 0.288            |
| rs749761903       | 0.482                               | 0.442                      | 0.067          | 0.056   | 0.055            |
| rs45512696        | 0.847                               | 0.350                      | 0.867          | 0.058   | 0.900            |
| rs12950562        | 0.774                               | 0.279                      | 0.057          | 0.060   | 0.072            |

|                                          |          |       |       |       |       |
|------------------------------------------|----------|-------|-------|-------|-------|
| rs7631981                                | 0.109    | 0.817 | 0.207 | 0.061 | 0.694 |
| 8:81430449_AT_A                          | 0.096    | 0.240 | 0.150 | 0.061 | 0.177 |
| 17:16062400_TA_T                         | 0.673    | 0.702 | 0.028 | 0.062 | 0.053 |
| 14:25948829_AAC_A                        | 0.741    | 0.624 | 0.658 | 0.064 | 0.688 |
| rs234051                                 | 0.578    | 0.929 | 0.511 | 0.066 | 0.431 |
| rs10822153                               | 0.379    | 0.877 | 0.145 | 0.069 | 0.288 |
| 6:28419903_GGT_G                         | 0.604    | 0.019 | 0.150 | 0.070 | 0.335 |
| rs1801689                                | 0.561    | 0.384 | 0.858 | 0.070 | 0.333 |
| rs4762755                                | 0.228    | 0.168 | 0.566 | 0.070 | 0.324 |
| rs78890745                               | 0.859    | 0.438 | 0.176 | 0.071 | 0.423 |
| rs140386498                              | 0.476    | 0.591 | 0.292 | 0.073 | 0.652 |
| rs36013981                               | 0.794    | 0.814 | 0.471 | 0.078 | 0.020 |
| rs2283760                                | 0.962    | 0.285 | 0.023 | 0.079 | 0.169 |
| rs5749082                                | 0.456    | 0.631 | 0.987 | 0.080 | 0.914 |
| 1:167851935_TGTAAGTGA<br>GAGGTAGCCCAGC_T | 0.912    | 0.008 | 0.700 | 0.082 | 0.957 |
| rs9914426                                | 0.029    | 0.618 | 0.642 | 0.096 | 0.523 |
| rs10864086                               | 0.327    | 0.133 | 0.585 | 0.104 | 0.186 |
| rs4809604                                | 0.085    | 0.295 | 0.398 | 0.106 | 0.783 |
| rs738409                                 | 0.140    | 0.256 | 0.039 | 0.109 | 0.352 |
| rs1058319                                | 0.558    | 0.215 | 0.773 | 0.110 | 0.101 |
| rs73109480                               | 0.279    | 0.894 | 0.170 | 0.118 | 0.317 |
| rs2288004                                | 0.744    | 0.250 | 0.004 | 0.118 | 0.000 |
| rs778571122                              | 0.656    | 0.953 | 0.529 | 0.118 | 0.339 |
| rs141811210                              | 0.284    | 0.352 | 0.364 | 0.121 | 0.937 |
| rs13280055                               | 0.023    | 0.243 | 0.355 | 0.122 | 0.079 |
| rs34372369                               | 0.479    | 0.039 | 0.170 | 0.124 | 0.607 |
| 17:8567107_CA_C                          | 0.557    | 0.833 | 0.720 | 0.126 | 0.916 |
| rs8038032                                | 0.579    | 0.389 | 0.750 | 0.128 | 0.061 |
| rs10069690                               | 0.212    | 0.561 | 0.344 | 0.130 | 0.810 |
| rs2277283                                | 0.061    | 0.730 | 0.414 | 0.139 | 0.584 |
| rs4673528                                | 0.049    | 0.906 | 0.803 | 0.140 | 0.268 |
| rs2287322                                | 0.286    | 0.897 | 0.754 | 0.142 | 0.183 |
| rs17036326                               | 0.575    | 0.037 | 0.619 | 0.143 | 0.952 |
| rs58321169                               | 0.646    | 0.611 | 0.865 | 0.146 | 0.833 |
| rs149675684                              | 0.732    | 0.380 | 0.976 | 0.149 | 0.010 |
| rs35526088                               | 0.638    | 0.823 | 0.585 | 0.150 | 0.954 |
| rs7254776                                | 0.552    | 0.893 | 0.504 | 0.153 | 0.014 |
| rs1859690                                | 0.549    | 0.106 | 0.376 | 0.155 | 0.557 |
| rs1883783                                | 0.179    | 0.363 | 0.341 | 0.155 | 0.608 |
| rs13315174                               | 0.341    | 0.272 | 0.950 | 0.160 | 0.282 |
| rs4725944                                | 0.485    | 0.886 | 0.388 | 0.167 | 0.663 |
| rs10421262                               | 0.319    | 0.724 | 0.779 | 0.168 | 0.534 |
| rs62182125                               | 0.000001 | 0.001 | 0.039 | 0.173 | 0.490 |
| rs140584594                              | 0.952    | 0.658 | 0.836 | 0.179 | 0.004 |

|                    |       |       |       |       |       |
|--------------------|-------|-------|-------|-------|-------|
| rs907866           | 0.200 | 0.784 | 0.301 | 0.179 | 0.501 |
| 7:74298343_TGAGA_T | 0.581 | 0.265 | 0.351 | 0.179 | 0.001 |
| rs55962409         | 0.066 | 0.065 | 0.044 | 0.180 | 0.379 |
| rs111981233        | 0.635 | 0.721 | 0.292 | 0.181 | 0.144 |
| rs36108764         | 0.583 | 0.810 | 0.754 | 0.182 | 0.627 |
| rs3781085          | 0.573 | 0.558 | 0.076 | 0.183 | 0.275 |
| rs860262           | 0.594 | 0.369 | 0.990 | 0.184 | 0.455 |
| rs6950023          | 0.895 | 0.358 | 0.392 | 0.184 | 0.630 |
| rs2002094          | 0.586 | 0.080 | 0.765 | 0.186 | 0.018 |
| rs6632893          | 0.989 | 0.018 | 0.104 | 0.188 | 0.214 |
| rs562609617        | 0.977 | 0.005 | 0.775 | 0.189 | 0.788 |
| rs111917063        | 0.240 | 0.675 | 0.455 | 0.191 | 0.012 |
| rs3746575          | 0.213 | 0.964 | 0.095 | 0.202 | 0.252 |
| rs864899           | 0.062 | 0.981 | 0.212 | 0.207 | 0.990 |
| rs10027275         | 0.009 | 0.394 | 0.633 | 0.210 | 0.054 |
| rs34390319         | 0.445 | 0.690 | 0.085 | 0.211 | 0.517 |
| rs12536766         | 0.256 | 0.617 | 0.920 | 0.213 | 0.730 |
| rs142740991        | 0.314 | 0.051 | 0.259 | 0.213 | 0.426 |
| rs17145750         | 0.564 | 0.516 | 0.812 | 0.221 | 0.018 |
| rs631695           | 0.535 | 0.995 | 0.579 | 0.225 | 0.754 |
| rs12694450         | 0.152 | 0.566 | 0.047 | 0.226 | 0.398 |
| rs187437           | 0.366 | 0.262 | 0.624 | 0.229 | 0.009 |
| rs17050272         | 0.903 | 0.936 | 0.963 | 0.229 | 0.513 |
| rs7210574          | 0.247 | 0.916 | 0.810 | 0.238 | 0.646 |
| rs3782735          | 0.876 | 0.540 | 0.471 | 0.241 | 0.021 |
| rs1037169          | 0.261 | 0.891 | 0.726 | 0.245 | 0.381 |
| rs10871794         | 0.230 | 0.252 | 0.131 | 0.246 | 0.466 |
| rs7438888          | 0.790 | 0.682 | 0.171 | 0.250 | 0.364 |
| 4:128987952_ATT_A  | 0.349 | 0.199 | 0.131 | 0.251 | 0.587 |
| rs35654957         | 0.756 | 0.588 | 0.817 | 0.251 | 0.168 |
| rs186915841        | 0.077 | 0.730 | 0.997 | 0.253 | 0.313 |
| rs71584764         | 0.668 | 0.610 | 0.165 | 0.255 | 0.014 |
| rs62195072         | 0.616 | 0.648 | 0.884 | 0.259 | 0.112 |
| rs144794875        | 0.157 | 0.061 | 0.301 | 0.264 | 0.056 |
| rs116338429        | 0.823 | 0.244 | 0.110 | 0.264 | 0.160 |
| rs773816354        | 0.274 | 0.380 | 0.358 | 0.265 | 0.222 |
| rs3927496          | 0.984 | 0.506 | 0.334 | 0.267 | 0.126 |
| 11:65227616_CAAA_C | 0.867 | 0.816 | 0.953 | 0.272 | 0.761 |
| rs2197771          | 0.964 | 0.066 | 0.303 | 0.273 | 0.175 |
| 1:196914907_AGT_A  | 0.225 | 0.342 | 0.023 | 0.274 | 0.546 |
| rs11994858         | 0.884 | 0.974 | 0.096 | 0.275 | 0.988 |
| rs7808613          | 0.479 | 0.403 | 0.644 | 0.277 | 0.586 |
| 9:112204335_AT_A   | 0.357 | 0.172 | 0.730 | 0.278 | 0.116 |
| rs11539938         | 0.435 | 0.389 | 0.003 | 0.280 | 0.557 |

|                          |       |       |       |       |       |
|--------------------------|-------|-------|-------|-------|-------|
| rs1799831                | 0.222 | 0.487 | 0.820 | 0.282 | 0.026 |
| rs6965401                | 0.729 | 0.702 | 0.451 | 0.284 | 0.923 |
| rs757253787              | 0.141 | 0.031 | 0.968 | 0.291 | 0.082 |
| 12:93632423_CA_C         | 0.734 | 0.992 | 0.907 | 0.291 | 0.293 |
| rs7655064                | 0.424 | 0.521 | 0.391 | 0.292 | 0.311 |
| rs687339                 | 0.415 | 0.879 | 0.128 | 0.294 | 0.238 |
| rs55855238               | 0.637 | 0.573 | 0.842 | 0.298 | 0.027 |
| rs11621792               | 0.514 | 0.033 | 0.361 | 0.302 | 0.754 |
| rs72948115               | 0.346 | 0.829 | 0.649 | 0.303 | 0.840 |
| rs73547906               | 0.270 | 0.029 | 0.832 | 0.304 | 0.112 |
| rs1730865                | 0.395 | 0.654 | 0.073 | 0.305 | 0.997 |
| rs4715316                | 0.162 | 0.905 | 0.528 | 0.306 | 0.101 |
| 2:111925731_CTTATGTT_C   | 0.939 | 0.786 | 0.513 | 0.307 | 0.429 |
| 9:123780856_AAAGGAAG_G_A | 0.279 | 0.762 | 0.693 | 0.309 | 0.689 |
| rs8176526                | 0.814 | 0.693 | 0.912 | 0.313 | 0.005 |
| rs501470                 | 0.119 | 0.105 | 0.908 | 0.316 | 0.004 |
| rs9379084                | 0.813 | 0.213 | 0.913 | 0.319 | 0.767 |
| rs1871395                | 0.503 | 0.932 | 0.306 | 0.322 | 0.124 |
| rs9266184                | 0.039 | 0.013 | 0.809 | 0.328 | 0.188 |
| rs13108218               | 0.418 | 0.869 | 0.096 | 0.329 | 0.020 |
| rs12696304               | 0.817 | 0.594 | 0.860 | 0.330 | 0.165 |
| rs72708162               | 0.198 | 0.522 | 0.450 | 0.331 | 0.467 |
| rs17185536               | 0.456 | 0.577 | 0.203 | 0.333 | 0.874 |
| rs12818938               | 0.006 | 0.368 | 0.281 | 0.336 | 0.359 |
| 1:23747996_GA_G          | 0.715 | 0.996 | 0.760 | 0.338 | 0.235 |
| rs904801                 | 0.543 | 0.306 | 0.141 | 0.338 | 0.005 |
| rs778239811              | 0.617 | 0.847 | 0.046 | 0.355 | 0.003 |
| rs72683923               | 0.435 | 0.589 | 0.517 | 0.355 | 0.205 |
| rs3006593                | 0.854 | 0.381 | 0.802 | 0.368 | 0.752 |
| rs7623513                | 0.264 | 0.849 | 0.601 | 0.370 | 0.005 |
| rs79717793               | 0.985 | 0.044 | 0.616 | 0.371 | 0.327 |
| rs4077285                | 0.766 | 0.749 | 0.454 | 0.374 | 0.488 |
| rs45490496               | 0.600 | 0.682 | 0.746 | 0.376 | 0.336 |
| rs12797706               | 0.061 | 0.140 | 0.721 | 0.379 | 0.406 |
| rs1640267                | 0.621 | 0.141 | 0.509 | 0.384 | 0.868 |
| rs2905801                | 0.986 | 0.110 | 0.965 | 0.385 | 0.023 |
| rs4645936                | 0.404 | 0.543 | 0.071 | 0.390 | 0.347 |
| rs768159759              | 0.142 | 0.834 | 0.447 | 0.392 | 0.059 |
| 13:115013423_TTCTC_T     | 0.247 | 0.245 | 0.188 | 0.394 | 0.193 |
| rs35225944               | 0.165 | 0.472 | 0.115 | 0.395 | 0.308 |
| rs62442919               | 0.087 | 0.374 | 0.097 | 0.398 | 0.121 |
| rs10083137               | 0.018 | 0.895 | 0.530 | 0.401 | 0.794 |
| rs75349541               | 0.221 | 0.173 | 0.492 | 0.412 | 0.522 |



|                  |       |       |       |       |       |
|------------------|-------|-------|-------|-------|-------|
| rs12690320       | 0.369 | 0.791 | 0.709 | 0.414 | 0.993 |
| rs75170914       | 0.416 | 0.200 | 0.085 | 0.415 | 0.809 |
| rs76895963       | 0.825 | 0.655 | 0.744 | 0.416 | 0.461 |
| rs4333851        | 0.444 | 0.927 | 0.421 | 0.417 | 0.014 |
| 17:67080811_CT_C | 0.342 | 0.800 | 0.057 | 0.418 | 0.948 |
| rs56187480       | 0.472 | 0.422 | 0.124 | 0.419 | 0.160 |
| rs8066941        | 0.858 | 0.686 | 0.405 | 0.421 | 0.955 |
| X:133611871_AT_A | 0.714 | 0.443 | 0.146 | 0.425 | 0.248 |
| rs114165349      | 0.760 | 0.800 | 0.831 | 0.426 | 0.522 |
| rs665731         | 0.074 | 0.159 | 0.843 | 0.426 | 0.453 |
| 1:1510035_GGC_G  | 0.058 | 0.161 | 0.570 | 0.427 | 0.533 |
| rs2239222        | 0.664 | 0.742 | 0.857 | 0.429 | 0.413 |
| rs10107182       | 0.919 | 0.717 | 0.115 | 0.430 | 0.934 |
| rs2222018        | 0.401 | 0.812 | 0.343 | 0.433 | 0.025 |
| rs41284816       | 0.834 | 0.203 | 0.058 | 0.433 | 0.988 |
| rs111643014      | 0.985 | 0.427 | 0.496 | 0.433 | 0.608 |
| rs8030357        | 0.222 | 0.819 | 0.830 | 0.437 | 0.430 |
| rs211644         | 0.206 | 0.410 | 0.656 | 0.438 | 0.003 |
| rs62394490       | 0.486 | 0.608 | 0.321 | 0.441 | 0.060 |
| rs10411958       | 0.335 | 0.684 | 0.786 | 0.441 | 0.850 |
| rs370654105      | 0.631 | 0.500 | 0.729 | 0.446 | 0.421 |
| rs7694379        | 0.245 | 0.241 | 0.058 | 0.448 | 0.047 |
| rs6900473        | 0.262 | 0.978 | 0.675 | 0.449 | 0.050 |
| rs3747647        | 0.026 | 0.764 | 0.845 | 0.450 | 0.193 |
| rs138529890      | 0.245 | 0.516 | 0.891 | 0.451 | 0.409 |
| rs771435780      | 0.760 | 0.692 | 0.746 | 0.456 | 0.056 |
| rs142627977      | 0.230 | 0.025 | 0.536 | 0.461 | 0.063 |
| rs4979372        | 0.971 | 0.831 | 0.168 | 0.461 | 0.017 |
| rs12059956       | 0.339 | 0.383 | 0.484 | 0.462 | 0.432 |
| rs876435         | 0.749 | 0.347 | 0.232 | 0.468 | 0.189 |
| rs11739158       | 0.920 | 0.521 | 0.109 | 0.469 | 0.549 |
| rs1570516        | 0.137 | 0.978 | 0.449 | 0.479 | 0.358 |
| rs2216707        | 0.088 | 0.078 | 0.172 | 0.480 | 0.725 |
| rs13379043       | 0.489 | 0.250 | 0.959 | 0.481 | 0.438 |
| rs56332871       | 0.695 | 0.538 | 0.278 | 0.489 | 0.245 |
| rs11867902       | 0.334 | 0.605 | 0.090 | 0.491 | 0.331 |
| rs2259305        | 0.360 | 0.392 | 0.411 | 0.496 | 0.371 |
| rs1005421        | 0.105 | 0.347 | 0.413 | 0.497 | 0.265 |
| rs10895277       | 0.074 | 0.010 | 0.849 | 0.500 | 0.195 |
| rs820503         | 0.704 | 0.662 | 0.514 | 0.503 | 0.831 |
| rs540730         | 0.078 | 0.018 | 0.752 | 0.512 | 0.105 |
| rs202200760      | 0.447 | 0.949 | 0.845 | 0.514 | 0.942 |
| 5:36206855_GAT_G | 0.296 | 0.140 | 0.577 | 0.515 | 0.659 |
| rs71115649       | 0.152 | 0.713 | 0.242 | 0.515 | 0.493 |

|                               |       |       |       |       |       |
|-------------------------------|-------|-------|-------|-------|-------|
| rs2721195                     | 0.822 | 0.641 | 0.759 | 0.519 | 0.615 |
| rs2431752                     | 0.938 | 0.365 | 0.116 | 0.521 | 0.932 |
| rs1229492                     | 0.737 | 0.744 | 0.948 | 0.530 | 0.847 |
| 9:19084633_CT_C               | 0.804 | 0.495 | 0.390 | 0.535 | 0.312 |
| rs2234694                     | 0.401 | 0.182 | 0.221 | 0.543 | 0.060 |
| rs116483731                   | 0.730 | 0.100 | 0.759 | 0.545 | 0.309 |
| rs79354983                    | 0.202 | 0.690 | 0.029 | 0.547 | 0.960 |
| rs148911629                   | 0.077 | 0.316 | 0.551 | 0.556 | 0.840 |
| rs6736913                     | 0.327 | 0.840 | 0.780 | 0.564 | 0.943 |
| rs10153800                    | 0.758 | 0.162 | 0.585 | 0.565 | 0.861 |
| rs10657979                    | 0.773 | 0.769 | 0.222 | 0.570 | 0.926 |
| rs11641834                    | 0.789 | 0.469 | 0.177 | 0.576 | 0.082 |
| rs114949263                   | 0.492 | 0.272 | 0.297 | 0.579 | 0.616 |
| rs528350911                   | 0.598 | 0.032 | 0.881 | 0.581 | 0.587 |
| rs78444298                    | 0.034 | 0.014 | 0.334 | 0.582 | 0.812 |
| rs10116426                    | 0.577 | 0.345 | 0.437 | 0.583 | 0.945 |
| rs12454712                    | 0.245 | 0.906 | 0.128 | 0.583 | 0.003 |
| rs61929307                    | 0.706 | 0.340 | 0.497 | 0.586 | 0.076 |
| rs4782568                     | 0.583 | 0.959 | 0.947 | 0.588 | 0.406 |
| rs144647926                   | 0.498 | 0.923 | 0.013 | 0.612 | 0.939 |
| rs202128511                   | 0.833 | 0.856 | 0.411 | 0.614 | 0.301 |
| rs771193934                   | 0.390 | 0.205 | 0.458 | 0.619 | 0.344 |
| rs191884522                   | 0.561 | 0.241 | 0.163 | 0.620 | 0.012 |
| rs1782652                     | 0.754 | 0.685 | 0.005 | 0.626 | 0.877 |
| rs1351394                     | 0.053 | 0.132 | 0.130 | 0.628 | 0.032 |
| rs11601507                    | 0.276 | 0.696 | 0.140 | 0.632 | 0.294 |
| rs184640919                   | 0.867 | 0.837 | 0.280 | 0.636 | 0.873 |
| rs79287178                    | 0.749 | 0.580 | 0.988 | 0.637 | 0.458 |
| 2:191559843_GT_G              | 0.387 | 0.456 | 0.964 | 0.640 | 0.528 |
| 8:81457499_CA_C               | 0.766 | 0.572 | 0.409 | 0.645 | 0.997 |
| rs4860987                     | 0.138 | 0.311 | 0.835 | 0.654 | 0.423 |
| rs2820441                     | 0.884 | 0.233 | 0.881 | 0.654 | 0.367 |
| rs11666245                    | 0.073 | 0.858 | 0.616 | 0.654 | 0.622 |
| rs769447487                   | 0.023 | 0.811 | 0.451 | 0.664 | 0.961 |
| rs36103835                    | 0.115 | 0.544 | 0.564 | 0.666 | 0.306 |
| rs62134282                    | 0.384 | 0.591 | 0.256 | 0.671 | 0.453 |
| rs7314285                     | 0.318 | 0.258 | 0.560 | 0.673 | 0.381 |
| rs41412647                    | 0.401 | 0.525 | 0.514 | 0.679 | 0.066 |
| rs3812275                     | 0.161 | 0.344 | 0.360 | 0.681 | 0.422 |
| rs1991401                     | 0.307 | 0.797 | 0.564 | 0.684 | 0.931 |
| rs56196860                    | 0.325 | 0.230 | 0.987 | 0.684 | 0.143 |
| rs6480299                     | 0.380 | 0.272 | 0.364 | 0.700 | 0.825 |
| rs17583875                    | 0.053 | 0.263 | 0.619 | 0.700 | 0.141 |
| 1:35734986_AAGTGCATC<br>TTT_A | 0.121 | 0.991 | 0.459 | 0.705 | 0.232 |

|             |       |       |       |       |       |
|-------------|-------|-------|-------|-------|-------|
| rs2247213   | 0.169 | 0.335 | 0.634 | 0.711 | 0.982 |
| rs149663666 | 0.830 | 0.278 | 0.484 | 0.715 | 0.710 |
| rs1890426   | 0.091 | 0.499 | 0.166 | 0.717 | 0.604 |
| rs762450647 | 0.204 | 0.538 | 0.934 | 0.727 | 0.946 |
| rs768651403 | 0.810 | 0.907 | 0.271 | 0.728 | 0.536 |
| rs28650012  | 0.293 | 0.106 | 0.649 | 0.733 | 0.015 |
| rs7096937   | 0.752 | 0.343 | 0.335 | 0.737 | 0.645 |
| rs12543287  | 0.566 | 0.458 | 0.699 | 0.741 | 0.932 |
| rs11655704  | 0.765 | 0.202 | 0.426 | 0.744 | 0.046 |
| rs6792725   | 0.466 | 0.410 | 0.218 | 0.750 | 0.460 |
| rs1870927   | 0.064 | 0.181 | 0.238 | 0.753 | 0.494 |
| rs112352679 | 0.645 | 0.037 | 0.988 | 0.753 | 0.541 |
| rs40270     | 0.733 | 0.717 | 0.139 | 0.753 | 0.986 |
| rs7175361   | 0.296 | 0.920 | 0.289 | 0.754 | 0.841 |
| rs198384    | 0.668 | 0.492 | 0.968 | 0.754 | 0.348 |
| rs35234337  | 0.670 | 0.602 | 0.732 | 0.755 | 0.182 |
| rs856534    | 0.897 | 0.531 | 0.563 | 0.756 | 0.232 |
| rs75130744  | 0.617 | 0.152 | 0.857 | 0.757 | 0.612 |
| rs56237852  | 0.268 | 0.373 | 0.145 | 0.759 | 0.624 |
| rs34771269  | 0.525 | 0.968 | 0.855 | 0.767 | 0.258 |
| rs8038465   | 0.124 | 0.576 | 0.949 | 0.769 | 0.253 |
| rs111767734 | 0.086 | 0.079 | 0.701 | 0.771 | 0.987 |
| rs60018147  | 0.250 | 0.863 | 0.486 | 0.773 | 0.455 |
| rs9697210   | 0.065 | 0.375 | 0.859 | 0.775 | 0.835 |
| rs71586027  | 0.002 | 0.069 | 0.261 | 0.784 | 0.155 |
| rs180956060 | 0.216 | 0.253 | 0.772 | 0.789 | 0.355 |
| rs780309846 | 0.249 | 0.543 | 0.386 | 0.790 | 0.170 |
| rs29681     | 0.544 | 0.237 | 0.966 | 0.817 | 0.967 |
| rs591939    | 0.164 | 0.179 | 0.445 | 0.831 | 0.000 |
| rs73909848  | 0.706 | 0.778 | 0.656 | 0.832 | 0.240 |
| rs246192    | 0.477 | 0.101 | 0.995 | 0.834 | 0.423 |
| rs3780190   | 0.618 | 0.920 | 0.807 | 0.837 | 0.203 |
| rs139974673 | 0.259 | 0.846 | 0.508 | 0.839 | 0.275 |
| rs1788641   | 0.043 | 0.393 | 0.070 | 0.840 | 0.364 |
| rs11732763  | 0.394 | 0.666 | 0.022 | 0.846 | 0.887 |
| rs12928099  | 0.374 | 0.251 | 0.324 | 0.850 | 0.940 |
| rs2564923   | 0.294 | 0.172 | 0.051 | 0.852 | 0.740 |
| rs157935    | 0.780 | 0.508 | 0.044 | 0.861 | 0.029 |
| rs12705095  | 0.992 | 0.861 | 0.039 | 0.865 | 0.341 |
| rs1567353   | 0.108 | 0.092 | 0.750 | 0.870 | 0.440 |
| rs13042148  | 0.614 | 0.112 | 0.116 | 0.873 | 0.787 |
| rs565728741 | 0.200 | 0.235 | 0.772 | 0.877 | 0.660 |
| rs775181992 | 0.428 | 0.335 | 0.339 | 0.879 | 0.300 |
| rs78319058  | 0.238 | 0.744 | 0.969 | 0.883 | 0.180 |

|                                |       |       |       |       |       |
|--------------------------------|-------|-------|-------|-------|-------|
| rs7780562                      | 0.002 | 0.161 | 0.171 | 0.884 | 0.127 |
| rs148427769                    | 0.184 | 0.963 | 0.019 | 0.885 | 0.795 |
| rs72729610                     | 0.869 | 0.782 | 0.180 | 0.889 | 0.168 |
| rs4812336                      | 0.842 | 0.826 | 0.029 | 0.893 | 0.705 |
| rs201764793                    | 0.814 | 0.503 | 0.341 | 0.895 | 0.459 |
| rs6258                         | 0.143 | 0.791 | 0.626 | 0.897 | 0.157 |
| rs35824797                     | 0.566 | 0.073 | 0.861 | 0.898 | 0.411 |
| rs11856926                     | 0.265 | 0.814 | 0.692 | 0.900 | 0.480 |
| rs36086195                     | 0.093 | 0.504 | 0.348 | 0.917 | 0.167 |
| rs72663907                     | 0.393 | 0.294 | 0.258 | 0.919 | 0.705 |
| rs60005573                     | 0.386 | 0.303 | 0.459 | 0.920 | 0.347 |
| rs753645751                    | 0.226 | 0.629 | 0.558 | 0.920 | 0.236 |
| rs1349852                      | 0.182 | 0.696 | 0.638 | 0.921 | 0.214 |
| rs143709973                    | 0.528 | 0.433 | 0.916 | 0.929 | 0.720 |
| rs6595447                      | 0.905 | 0.240 | 0.809 | 0.932 | 0.018 |
| rs6939861                      | 0.311 | 0.084 | 0.782 | 0.935 | 0.030 |
| rs2156805                      | 0.495 | 0.810 | 0.663 | 0.940 | 0.374 |
| rs13389219                     | 0.878 | 0.953 | 0.573 | 0.943 | 0.002 |
| rs17747324                     | 0.033 | 0.012 | 0.980 | 0.946 | 0.715 |
| rs7735249                      | 0.236 | 0.898 | 0.933 | 0.946 | 0.213 |
| rs997907                       | 0.186 | 0.889 | 0.019 | 0.953 | 0.077 |
| rs11398692                     | 0.494 | 0.109 | 0.655 | 0.953 | 0.379 |
| rs9738226                      | 0.518 | 0.114 | 0.086 | 0.953 | 0.313 |
| rs2106854                      | 0.982 | 0.372 | 0.921 | 0.953 | 0.542 |
| rs35067979                     | 0.786 | 0.913 | 0.613 | 0.957 | 0.271 |
| rs174528                       | 0.031 | 0.001 | 0.111 | 0.964 | 0.106 |
| rs73631501                     | 0.355 | 0.874 | 0.077 | 0.968 | 0.873 |
| 16:1786202_TGTGTGACC<br>ATCC_T | 0.631 | 0.764 | 0.150 | 0.969 | 0.064 |
| rs187325356                    | 0.468 | 0.659 | 0.532 | 0.969 | 0.213 |
| rs754959778                    | 0.234 | 0.121 | 0.220 | 0.969 | 0.126 |
| 1:25827633_CT_C                | 0.313 | 0.024 | 0.971 | 0.978 | 0.619 |
| rs2238799                      | 0.035 | 0.065 | 0.017 | 0.983 | 0.208 |
| rs1260326                      | 0.150 | 0.187 | 0.352 | 0.985 | 0.000 |
| rs7892835                      | 0.117 | 0.327 | 0.560 | 0.986 | 0.153 |
| rs2106727                      | 0.590 | 0.053 | 0.292 | 0.987 | 0.909 |
| rs10649697                     | 0.967 | 0.580 | 0.498 | 0.988 | 0.333 |
| rs17669311                     | 0.562 | 0.546 | 0.972 | 0.989 | 0.127 |
| rs28562483                     | 0.266 | 0.657 | 0.781 | 0.989 | 0.314 |
| rs61755050                     | 0.158 | 0.674 | 0.744 | 0.990 | 0.083 |
| rs1799941                      | 0.850 | 0.199 | 0.319 | 0.993 | 0.148 |
| 3:49562992_CT_C                | 0.418 | 0.863 | 0.805 | 1.000 | 0.000 |

---

**Supplementary Table 5.** Associations of genetic predictors for SHBG with potential confounders in women

| SNP                   | P value with potential confounders |                            |                |         |                  |
|-----------------------|------------------------------------|----------------------------|----------------|---------|------------------|
|                       | Moderate physical activity         | Vigorous physical activity | Townsend index | smoking | Alcohol drinking |
| 1:155867257_CAA_C     | 0.036                              | 0.453                      | 0.959          | 0.791   | 0.040            |
| 1:221048577_TGA_T     | 0.576                              | 0.989                      | 0.931          | 0.689   | 0.193            |
| 1:23747996_GA_G       | 0.901                              | 0.850                      | 0.985          | 0.235   | 0.993            |
| 1:57170378_AATC_A     | 0.827                              | 0.936                      | 0.209          | 0.751   | 0.213            |
| 1:93787087_TA_T       | 0.876                              | 0.661                      | 0.228          | 0.317   | 0.969            |
| 10:65158772_AAAG_A    | 0.437                              | 0.842                      | 0.032          | 0.024   | 0.146            |
| 12:103483327_AT_A     | 0.281                              | 0.329                      | 0.026          | 0.024   | 0.773            |
| 12:12562340_GT_G      | 0.731                              | 0.562                      | 0.034          | 0.644   | 0.776            |
| 12:26614614_CAT_C     | 0.502                              | 0.138                      | 0.777          | 0.801   | 0.262            |
| 13:50565104_ACT_A     | 0.757                              | 0.693                      | 0.785          | 0.993   | 0.842            |
| 15:51052455_CT_C      | 0.157                              | 0.807                      | 0.959          | 0.731   | 0.266            |
| 15:53094375_TTTTG_T   | 0.893                              | 0.154                      | 0.035          | 0.194   | 0.875            |
| 17:48627860_CCT_C     | 0.485                              | 0.648                      | 0.590          | 0.338   | 0.206            |
| 19:7223973_TTTG_T     | 0.410                              | 0.306                      | 0.232          | 0.127   | 0.403            |
| 2:191559843_GT_G      | 0.287                              | 0.800                      | 0.785          | 0.348   | 0.875            |
| 2:208469213_ATCTT_A   | 0.851                              | 0.240                      | 0.129          | 0.097   | 0.835            |
| 3:122361173_TTTTTC_T  | 0.128                              | 0.668                      | 0.470          | 0.823   | 0.722            |
| 4:103877471_TA_T      | 0.014                              | 0.601                      | 0.564          | 0.058   | 0.019            |
| 6:130386212_GGAGA_G   | 0.246                              | 0.035                      | 0.094          | 0.758   | 0.462            |
| 7:130438531_CTTTTTT_C | 0.005                              | 0.551                      | 0.913          | 0.857   | 0.110            |
| 8:59415339_TTG_T      | 0.775                              | 0.124                      | 0.569          | 0.344   | 0.345            |
| 8:81457499_CA_C       | 0.020                              | 0.123                      | 0.837          | 0.412   | 0.582            |
| 9:127474886_CA_C      | 0.994                              | 0.191                      | 0.133          | 0.422   | 0.004            |
| rs1005421             | 0.717                              | 0.433                      | 0.844          | 0.982   | 0.357            |
| rs10095380            | 0.826                              | 0.701                      | 0.769          | 0.720   | 0.198            |
| rs10095930            | 0.314                              | 0.460                      | 0.292          | 0.548   | 0.958            |
| rs10108150            | 0.184                              | 0.344                      | 0.760          | 0.536   | 0.410            |
| rs10153315            | 0.160                              | 0.809                      | 0.896          | 0.451   | 0.891            |
| rs10189479            | 0.836                              | 0.980                      | 0.098          | 0.366   | 0.201            |
| rs10238028            | 0.646                              | 0.076                      | 0.697          | 0.284   | 0.276            |
| rs1033667             | 0.142                              | 0.113                      | 0.034          | 0.150   | 0.832            |
| rs1037169             | 0.708                              | 0.560                      | 0.824          | 0.232   | 0.803            |
| rs10461018            | 0.586                              | 0.477                      | 0.954          | 0.367   | 0.852            |
| rs1047891             | 0.541                              | 0.033                      | 0.559          | 0.697   | 0.812            |
| rs10486782            | 0.354                              | 0.561                      | 0.705          | 0.693   | 0.065            |
| rs10489206            | 0.165                              | 0.363                      | 0.689          | 0.743   | 0.743            |
| rs10511002            | 0.076                              | 0.133                      | 0.974          | 0.355   | 0.051            |
| rs10622246            | 0.797                              | 0.581                      | 0.281          | 0.657   | 0.811            |

|             |       |       |       |       |       |
|-------------|-------|-------|-------|-------|-------|
| rs10747689  | 0.072 | 0.032 | 0.678 | 0.014 | 0.172 |
| rs10774095  | 0.041 | 0.388 | 0.118 | 0.659 | 0.461 |
| rs10815276  | 0.317 | 0.704 | 0.725 | 0.619 | 0.540 |
| rs10857228  | 0.058 | 0.413 | 0.380 | 0.373 | 0.484 |
| rs10880868  | 0.403 | 0.504 | 0.400 | 0.222 | 0.153 |
| rs10883451  | 0.083 | 0.045 | 0.628 | 0.658 | 0.020 |
| rs10893876  | 0.598 | 0.873 | 0.472 | 0.416 | 0.189 |
| rs10939934  | 0.375 | 0.845 | 0.784 | 0.266 | 0.412 |
| rs10961205  | 0.756 | 0.390 | 0.045 | 0.332 | 0.111 |
| rs11021232  | 0.745 | 0.333 | 0.037 | 0.502 | 0.332 |
| rs11047237  | 0.790 | 0.828 | 0.793 | 0.538 | 0.163 |
| rs11054861  | 0.727 | 0.312 | 0.888 | 0.076 | 0.127 |
| rs11078597  | 0.555 | 0.452 | 0.667 | 0.501 | 0.955 |
| rs11079685  | 0.313 | 0.701 | 0.650 | 0.711 | 0.504 |
| rs11103377  | 0.656 | 0.397 | 0.761 | 0.178 | 0.016 |
| rs111270317 | 0.090 | 0.015 | 0.773 | 0.015 | 0.985 |
| rs111288118 | 0.325 | 0.945 | 0.027 | 0.903 | 0.521 |
| rs11130982  | 0.246 | 0.404 | 0.161 | 0.899 | 0.191 |
| rs11186719  | 0.640 | 0.804 | 0.558 | 0.537 | 0.383 |
| rs11188601  | 0.244 | 0.897 | 0.830 | 0.201 | 0.560 |
| rs112332688 | 0.871 | 0.745 | 0.259 | 0.092 | 0.816 |
| rs1126161   | 0.626 | 0.553 | 0.113 | 0.190 | 0.686 |
| rs1128249   | 0.087 | 0.615 | 0.761 | 0.095 | 0.001 |
| rs112966033 | 0.183 | 0.773 | 0.373 | 0.726 | 0.024 |
| rs113408476 | 0.556 | 0.861 | 0.355 | 0.824 | 0.288 |
| rs11376788  | 0.545 | 0.191 | 0.685 | 0.773 | 0.601 |
| rs114165349 | 0.630 | 0.789 | 0.466 | 0.309 | 0.694 |
| rs114816312 | 0.199 | 0.494 | 0.260 | 0.658 | 0.872 |
| rs114949263 | 0.570 | 0.309 | 0.729 | 0.406 | 0.570 |
| rs115209326 | 0.646 | 0.354 | 0.842 | 0.317 | 0.344 |
| rs11539938  | 0.556 | 0.772 | 0.963 | 0.469 | 0.744 |
| rs11556924  | 0.930 | 0.499 | 0.284 | 0.044 | 0.528 |
| rs11601507  | 0.523 | 0.146 | 0.714 | 0.153 | 0.504 |
| rs11621792  | 0.616 | 0.236 | 0.842 | 0.159 | 0.351 |
| rs116279971 | 0.083 | 0.341 | 0.852 | 0.271 | 0.031 |
| rs11637595  | 0.938 | 0.661 | 0.666 | 0.418 | 0.650 |
| rs11641834  | 0.139 | 0.434 | 0.925 | 0.022 | 0.409 |
| rs11664106  | 0.815 | 0.613 | 0.622 | 0.263 | 0.036 |
| rs11666245  | 0.024 | 0.110 | 0.082 | 0.322 | 0.955 |
| rs11668201  | 0.681 | 0.925 | 0.730 | 0.038 | 0.017 |
| rs11688682  | 0.489 | 0.457 | 0.891 | 0.006 | 0.440 |
| rs11690748  | 0.522 | 0.782 | 0.508 | 0.295 | 0.010 |

|             |       |       |       |       |       |
|-------------|-------|-------|-------|-------|-------|
| rs11720108  | 0.586 | 0.117 | 0.030 | 0.737 | 0.045 |
| rs11738093  | 0.949 | 0.408 | 0.498 | 0.504 | 0.075 |
| rs117522510 | 0.246 | 0.898 | 0.477 | 0.301 | 0.062 |
| rs11774700  | 0.828 | 0.996 | 0.290 | 0.282 | 0.035 |
| rs11780978  | 0.649 | 0.159 | 0.868 | 0.687 | 0.609 |
| rs11791747  | 0.460 | 0.311 | 0.089 | 0.714 | 0.017 |
| rs11830764  | 0.683 | 0.815 | 0.703 | 0.161 | 0.243 |
| rs11967262  | 0.584 | 0.857 | 0.996 | 0.412 | 0.359 |
| rs12012896  | 0.031 | 0.064 | 0.002 | 0.204 | 0.100 |
| rs12138803  | 0.472 | 0.577 | 0.159 | 0.457 | 0.335 |
| rs1223796   | 0.631 | 0.447 | 0.044 | 0.922 | 0.143 |
| rs12280075  | 0.547 | 0.526 | 0.020 | 0.263 | 0.050 |
| rs1229498   | 0.699 | 0.254 | 0.321 | 0.456 | 0.528 |
| rs12311848  | 0.891 | 0.745 | 0.905 | 0.070 | 0.479 |
| rs12438742  | 0.830 | 0.761 | 0.369 | 0.740 | 0.964 |
| rs12454712  | 0.276 | 0.295 | 0.456 | 0.217 | 0.312 |
| rs12543287  | 0.331 | 0.528 | 0.065 | 0.208 | 0.957 |
| rs12593818  | 0.199 | 0.029 | 0.692 | 0.205 | 0.387 |
| rs1260326   | 0.541 | 0.025 | 0.740 | 0.022 | 0.000 |
| rs12613243  | 0.286 | 0.624 | 0.819 | 0.193 | 0.773 |
| rs12624244  | 0.231 | 0.105 | 0.690 | 0.840 | 0.738 |
| rs12787996  | 0.241 | 0.866 | 0.277 | 0.791 | 0.165 |
| rs12797706  | 0.870 | 0.266 | 0.349 | 0.151 | 0.381 |
| rs12804411  | 0.920 | 0.195 | 0.949 | 0.606 | 0.845 |
| rs12864658  | 0.924 | 0.100 | 0.715 | 0.489 | 0.864 |
| rs12906447  | 0.105 | 0.543 | 0.940 | 0.622 | 0.891 |
| rs13018007  | 0.858 | 0.597 | 0.841 | 0.118 | 0.008 |
| rs13042148  | 0.078 | 0.940 | 0.905 | 0.091 | 0.379 |
| rs13108218  | 0.927 | 0.155 | 0.396 | 0.027 | 0.000 |
| rs13150068  | 0.082 | 0.753 | 0.855 | 0.242 | 0.868 |
| rs13200245  | 0.523 | 0.449 | 0.129 | 0.391 | 0.481 |
| rs13237750  | 0.635 | 0.212 | 0.480 | 0.064 | 0.952 |
| rs1330307   | 0.581 | 0.631 | 0.453 | 0.919 | 0.241 |
| rs13303359  | 0.293 | 0.373 | 0.369 | 0.165 | 0.199 |
| rs13379043  | 0.066 | 0.604 | 0.325 | 0.152 | 0.025 |
| rs13394092  | 0.424 | 0.303 | 0.312 | 0.201 | 0.615 |
| rs138204164 | 0.623 | 0.731 | 0.140 | 0.652 | 0.573 |
| rs139974673 | 0.072 | 0.186 | 0.181 | 0.157 | 0.258 |
| rs140302625 | 0.925 | 0.978 | 0.174 | 0.492 | 0.099 |
| rs140312320 | 0.431 | 0.634 | 0.185 | 0.643 | 0.985 |
| rs140584594 | 0.730 | 0.306 | 0.681 | 0.426 | 0.197 |
| rs1418652   | 0.132 | 0.690 | 0.709 | 0.680 | 0.111 |

|             |       |       |       |       |       |
|-------------|-------|-------|-------|-------|-------|
| rs1433210   | 0.664 | 0.042 | 0.906 | 0.110 | 0.001 |
| rs143378550 | 0.363 | 0.448 | 0.744 | 0.563 | 0.338 |
| rs146104952 | 0.830 | 0.306 | 0.932 | 0.382 | 0.039 |
| rs146104952 | 0.902 | 0.214 | 0.973 | 0.427 | 0.058 |
| rs147153202 | 0.683 | 0.325 | 0.874 | 0.982 | 0.751 |
| rs148911629 | 0.860 | 0.784 | 0.043 | 0.878 | 0.494 |
| rs150115323 | 0.515 | 0.628 | 0.602 | 0.248 | 0.323 |
| rs150584036 | 0.017 | 0.096 | 0.028 | 0.961 | 0.034 |
| rs1530439   | 0.965 | 0.629 | 0.927 | 0.161 | 0.275 |
| rs1634791   | 0.109 | 0.988 | 0.480 | 0.329 | 0.365 |
| rs1650527   | 0.190 | 0.775 | 0.159 | 0.863 | 0.315 |
| rs1684608   | 0.862 | 0.061 | 0.118 | 0.534 | 0.418 |
| rs16995626  | 0.264 | 0.095 | 0.371 | 0.374 | 0.455 |
| rs17128091  | 0.400 | 0.902 | 0.183 | 0.103 | 0.609 |
| rs17202341  | 0.430 | 0.165 | 0.819 | 0.698 | 0.703 |
| rs1730862   | 0.453 | 0.679 | 0.413 | 0.116 | 0.981 |
| rs1738386   | 0.920 | 0.272 | 0.446 | 0.390 | 0.630 |
| rs1741344   | 0.259 | 0.020 | 0.605 | 0.426 | 0.356 |
| rs174537    | 0.687 | 0.550 | 0.008 | 0.622 | 0.621 |
| rs17492269  | 0.787 | 0.095 | 0.390 | 0.341 | 0.751 |
| rs17580     | 0.920 | 0.240 | 0.962 | 0.937 | 0.069 |
| rs17583875  | 0.625 | 0.347 | 0.649 | 0.156 | 0.965 |
| rs17616365  | 0.035 | 0.462 | 0.040 | 0.483 | 0.441 |
| rs17669311  | 0.289 | 0.718 | 0.901 | 0.699 | 0.146 |
| rs1782652   | 0.416 | 0.966 | 0.241 | 0.638 | 0.776 |
| rs17887160  | 0.331 | 0.110 | 0.146 | 0.807 | 0.327 |
| rs1801282   | 0.289 | 0.855 | 0.815 | 0.444 | 0.654 |
| rs183015141 | 0.620 | 0.857 | 0.911 | 0.329 | 0.733 |
| rs185044544 | 0.420 | 0.094 | 0.949 | 0.012 | 0.789 |
| rs1870927   | 0.218 | 0.825 | 0.135 | 0.906 | 0.166 |
| rs1872992   | 0.300 | 0.230 | 0.231 | 0.033 | 0.562 |
| rs1962883   | 0.113 | 0.100 | 0.115 | 0.413 | 0.264 |
| rs198358    | 0.545 | 0.954 | 0.064 | 0.900 | 0.092 |
| rs199607859 | 0.288 | 0.036 | 0.600 | 0.592 | 0.689 |
| rs2009310   | 0.035 | 0.034 | 0.835 | 0.761 | 0.032 |
| rs201468966 | 0.195 | 0.224 | 0.017 | 0.117 | 0.045 |
| rs2018519   | 0.575 | 0.999 | 0.305 | 0.517 | 0.068 |
| rs201874554 | 0.545 | 0.851 | 0.643 | 0.295 | 0.265 |
| rs202021413 | 0.001 | 0.001 | 0.372 | 0.783 | 0.481 |
| rs202200760 | 0.128 | 0.402 | 0.887 | 0.670 | 0.464 |
| rs2057655   | 0.737 | 0.949 | 0.124 | 0.960 | 0.800 |
| rs2064074   | 0.670 | 0.945 | 0.879 | 0.852 | 0.980 |



|            |       |       |       |       |       |
|------------|-------|-------|-------|-------|-------|
| rs2068888  | 0.063 | 0.855 | 0.948 | 0.459 | 0.557 |
| rs2176040  | 0.230 | 0.520 | 0.595 | 0.101 | 0.008 |
| rs2207132  | 0.144 | 0.067 | 0.226 | 0.446 | 0.658 |
| rs2239222  | 0.398 | 0.734 | 0.689 | 0.975 | 0.106 |
| rs2246223  | 0.002 | 0.608 | 0.016 | 0.072 | 0.151 |
| rs2288926  | 0.972 | 0.933 | 0.697 | 0.170 | 0.845 |
| rs2299055  | 0.247 | 0.263 | 0.834 | 0.999 | 0.411 |
| rs2364717  | 0.400 | 0.040 | 0.467 | 0.786 | 0.191 |
| rs2438109  | 0.392 | 0.530 | 0.392 | 0.398 | 0.498 |
| rs2498786  | 0.101 | 0.702 | 0.886 | 0.574 | 0.657 |
| rs2525570  | 0.945 | 0.916 | 0.336 | 0.896 | 0.000 |
| rs267733   | 0.752 | 0.257 | 0.350 | 0.003 | 0.470 |
| rs2723555  | 0.310 | 0.147 | 0.862 | 0.350 | 0.136 |
| rs275177   | 0.726 | 0.370 | 0.744 | 0.225 | 0.493 |
| rs28360642 | 0.749 | 0.099 | 0.762 | 0.012 | 0.224 |
| rs28459049 | 0.374 | 0.238 | 0.595 | 0.952 | 0.625 |
| rs28636815 | 0.270 | 0.648 | 0.736 | 0.876 | 0.115 |
| rs28712547 | 0.620 | 0.806 | 0.789 | 0.678 | 0.911 |
| rs28925904 | 0.445 | 0.850 | 0.054 | 0.124 | 0.022 |
| rs28929470 | 0.749 | 0.669 | 0.371 | 0.177 | 0.318 |
| rs28929474 | 0.293 | 0.043 | 0.504 | 0.004 | 0.029 |
| rs2915023  | 0.134 | 0.266 | 0.834 | 0.925 | 0.621 |
| rs2924808  | 0.065 | 0.539 | 0.644 | 0.928 | 0.164 |
| rs2925979  | 0.354 | 0.120 | 0.951 | 0.888 | 0.732 |
| rs2970871  | 0.522 | 0.062 | 0.108 | 0.594 | 0.400 |
| rs2980858  | 0.187 | 0.728 | 0.135 | 0.414 | 0.008 |
| rs2986669  | 0.741 | 0.231 | 0.927 | 0.478 | 0.998 |
| rs3001032  | 0.102 | 0.638 | 0.074 | 0.461 | 0.334 |
| rs3018695  | 0.092 | 0.925 | 0.193 | 0.333 | 0.601 |
| rs34154818 | 0.282 | 0.074 | 0.887 | 0.749 | 0.309 |
| rs34184867 | 0.530 | 0.438 | 0.222 | 0.750 | 0.208 |
| rs34255979 | 0.781 | 0.454 | 0.448 | 0.045 | 0.988 |
| rs34311866 | 0.933 | 0.834 | 0.996 | 0.006 | 0.819 |
| rs34331968 | 0.173 | 0.842 | 0.063 | 0.702 | 0.649 |
| rs34385891 | 0.844 | 0.802 | 0.083 | 0.676 | 0.529 |
| rs34499031 | 0.638 | 0.712 | 0.456 | 0.339 | 0.105 |
| rs34651    | 0.559 | 0.448 | 0.970 | 0.894 | 0.788 |
| rs35143646 | 0.552 | 0.880 | 0.150 | 0.585 | 0.157 |
| rs35198068 | 0.520 | 0.565 | 0.119 | 0.408 | 0.565 |
| rs35233014 | 0.779 | 0.565 | 0.598 | 0.212 | 0.110 |
| rs35475471 | 0.147 | 0.034 | 0.249 | 0.542 | 0.737 |
| rs35568851 | 0.622 | 0.158 | 0.242 | 0.734 | 0.725 |

|             |       |       |       |       |       |
|-------------|-------|-------|-------|-------|-------|
| rs35696875  | 0.159 | 0.316 | 0.563 | 0.550 | 0.591 |
| rs3733321   | 0.046 | 0.592 | 0.123 | 0.803 | 0.973 |
| rs3747207   | 0.857 | 0.451 | 0.093 | 0.333 | 0.088 |
| rs3747367   | 0.355 | 0.012 | 0.650 | 0.973 | 0.982 |
| rs3749228   | 0.150 | 0.794 | 0.204 | 0.777 | 0.002 |
| rs3751129   | 0.432 | 0.930 | 0.035 | 0.000 | 0.120 |
| rs3768420   | 0.742 | 0.611 | 0.596 | 0.748 | 0.860 |
| rs3782735   | 0.743 | 0.634 | 0.185 | 0.317 | 0.916 |
| rs390408    | 0.261 | 0.019 | 0.731 | 0.803 | 0.332 |
| rs40270     | 0.105 | 0.698 | 0.891 | 0.368 | 0.108 |
| rs4077285   | 0.029 | 0.995 | 0.565 | 0.950 | 0.383 |
| rs4092465   | 0.082 | 0.661 | 0.305 | 0.997 | 0.002 |
| rs4122352   | 0.187 | 0.561 | 0.488 | 0.042 | 0.900 |
| rs41280463  | 0.385 | 0.992 | 0.648 | 0.649 | 0.105 |
| rs4149056   | 0.014 | 0.260 | 0.528 | 0.895 | 0.204 |
| rs4264433   | 0.721 | 0.016 | 0.589 | 0.828 | 0.014 |
| rs4307773   | 0.780 | 0.312 | 0.279 | 0.243 | 0.908 |
| rs4327143   | 0.661 | 0.393 | 0.179 | 0.625 | 0.292 |
| rs4450871   | 0.456 | 0.724 | 0.995 | 0.503 | 0.901 |
| rs4530527   | 0.105 | 0.612 | 0.014 | 0.175 | 0.318 |
| rs4563785   | 0.510 | 0.849 | 0.598 | 0.130 | 0.333 |
| rs469721    | 0.316 | 0.252 | 0.516 | 0.762 | 0.024 |
| rs4709746   | 0.046 | 0.381 | 0.911 | 0.925 | 0.985 |
| rs4804669   | 0.680 | 0.263 | 0.118 | 0.161 | 0.447 |
| rs4810580   | 0.789 | 0.944 | 0.084 | 0.329 | 0.120 |
| rs4830411   | 0.537 | 0.367 | 0.853 | 0.505 | 0.026 |
| rs4837794   | 0.695 | 0.975 | 0.427 | 0.021 | 0.011 |
| rs4871015   | 0.700 | 0.481 | 0.975 | 0.380 | 0.191 |
| rs4876993   | 0.169 | 0.115 | 0.026 | 0.670 | 0.929 |
| rs4976033   | 0.908 | 0.777 | 0.258 | 0.978 | 0.155 |
| rs5112      | 0.286 | 0.510 | 0.666 | 0.789 | 0.901 |
| rs5117      | 0.000 | 0.045 | 0.055 | 0.118 | 0.395 |
| rs528350911 | 0.047 | 0.671 | 0.690 | 0.125 | 0.565 |
| rs528806375 | 0.411 | 0.209 | 0.882 | 0.153 | 0.064 |
| rs545206972 | 0.316 | 0.956 | 0.265 | 0.746 | 0.483 |
| rs548235873 | 0.268 | 0.255 | 0.012 | 0.000 | 0.078 |
| rs549664712 | 0.886 | 0.945 | 0.233 | 0.178 | 0.000 |
| rs550767741 | 0.680 | 0.408 | 0.138 | 0.240 | 0.623 |
| rs555234816 | 0.444 | 0.485 | 0.902 | 0.500 | 0.915 |
| rs555754    | 0.165 | 0.612 | 0.358 | 0.922 | 0.010 |
| rs56332871  | 0.247 | 0.287 | 0.114 | 0.239 | 0.295 |
| rs568656    | 0.681 | 0.107 | 0.841 | 0.485 | 0.104 |

|            |       |       |       |       |       |
|------------|-------|-------|-------|-------|-------|
| rs57158761 | 0.457 | 0.545 | 0.691 | 0.231 | 0.160 |
| rs5750131  | 0.285 | 0.391 | 0.733 | 0.098 | 0.401 |
| rs5753111  | 0.863 | 0.555 | 0.221 | 0.345 | 0.198 |
| rs5791099  | 0.133 | 0.400 | 0.666 | 0.078 | 0.633 |
| rs5813220  | 0.732 | 0.801 | 0.300 | 0.605 | 0.371 |
| rs5820605  | 0.428 | 0.083 | 0.007 | 0.606 | 0.000 |
| rs58321169 | 0.468 | 0.277 | 0.335 | 0.095 | 0.157 |
| rs58489806 | 0.033 | 0.090 | 0.300 | 0.831 | 0.259 |
| rs59774409 | 0.172 | 0.361 | 0.578 | 0.874 | 0.499 |
| rs59837038 | 0.788 | 0.414 | 0.431 | 0.018 | 0.904 |
| rs60018147 | 0.295 | 0.778 | 0.436 | 0.541 | 0.020 |
| rs6058067  | 0.318 | 0.588 | 0.824 | 0.681 | 0.717 |
| rs6073431  | 0.934 | 0.599 | 0.245 | 0.225 | 0.105 |
| rs6088776  | 0.291 | 0.749 | 0.453 | 0.046 | 0.147 |
| rs6129778  | 0.248 | 0.764 | 0.410 | 0.651 | 0.048 |
| rs6129778  | 0.246 | 0.155 | 0.725 | 0.370 | 0.786 |
| rs61755050 | 0.757 | 0.520 | 0.128 | 0.078 | 0.313 |
| rs61830291 | 0.459 | 0.151 | 0.959 | 0.621 | 0.047 |
| rs62128735 | 0.113 | 0.146 | 0.419 | 0.204 | 0.034 |
| rs62186584 | 0.673 | 0.033 | 0.044 | 0.106 | 0.766 |
| rs62271373 | 0.845 | 0.974 | 0.200 | 0.356 | 0.001 |
| rs62303689 | 0.935 | 0.020 | 0.641 | 0.530 | 0.965 |
| rs62486442 | 0.972 | 0.149 | 0.211 | 0.610 | 0.908 |
| rs62515079 | 0.705 | 0.204 | 0.643 | 0.490 | 0.108 |
| rs62580766 | 0.128 | 0.028 | 0.116 | 0.330 | 0.444 |
| rs6531735  | 0.518 | 0.158 | 0.049 | 0.564 | 0.508 |
| rs6546096  | 0.436 | 0.517 | 0.809 | 0.637 | 0.393 |
| rs6706     | 0.804 | 0.098 | 0.707 | 0.424 | 0.312 |
| rs6736913  | 0.539 | 0.884 | 0.977 | 0.864 | 0.966 |
| rs67651018 | 0.289 | 0.474 | 0.357 | 0.218 | 0.240 |
| rs6772177  | 0.534 | 0.053 | 0.650 | 0.851 | 0.180 |
| rs67890964 | 0.863 | 0.653 | 0.272 | 0.086 | 0.795 |
| rs6792725  | 0.032 | 0.391 | 0.406 | 0.875 | 0.103 |
| rs68002561 | 0.500 | 0.291 | 0.323 | 0.794 | 0.218 |
| rs6803518  | 0.153 | 0.485 | 0.287 | 0.296 | 0.685 |
| rs6831257  | 0.071 | 0.548 | 0.255 | 0.346 | 0.386 |
| rs6860245  | 0.810 | 0.946 | 0.964 | 0.771 | 0.059 |
| rs687339   | 0.379 | 0.876 | 0.523 | 0.664 | 0.204 |
| rs6879874  | 0.775 | 0.856 | 0.771 | 0.825 | 0.689 |
| rs696825   | 0.321 | 0.238 | 0.660 | 0.295 | 0.919 |
| rs7139079  | 0.787 | 0.561 | 0.329 | 0.024 | 0.180 |
| rs71468663 | 0.862 | 0.527 | 0.412 | 0.477 | 0.604 |

|             |       |       |       |       |       |
|-------------|-------|-------|-------|-------|-------|
| rs71531849  | 0.294 | 0.498 | 0.687 | 0.188 | 0.443 |
| rs7250869   | 0.505 | 0.712 | 0.746 | 0.006 | 0.828 |
| rs7252372   | 0.778 | 0.048 | 0.429 | 0.345 | 0.671 |
| rs72681869  | 0.463 | 0.915 | 0.093 | 0.065 | 0.041 |
| rs72766607  | 0.338 | 0.649 | 0.525 | 0.674 | 0.032 |
| rs72782727  | 0.341 | 0.484 | 0.218 | 0.069 | 0.213 |
| rs72836346  | 0.695 | 0.902 | 0.003 | 0.146 | 0.130 |
| rs72844546  | 0.338 | 0.468 | 0.852 | 0.017 | 0.571 |
| rs7298820   | 0.544 | 0.962 | 0.975 | 0.866 | 0.434 |
| rs73036519  | 0.754 | 0.426 | 0.051 | 0.504 | 0.005 |
| rs7321688   | 0.015 | 0.340 | 0.694 | 0.703 | 0.427 |
| rs73519353  | 0.777 | 0.932 | 0.946 | 0.989 | 0.329 |
| rs73519353  | 0.142 | 0.042 | 0.345 | 0.470 | 0.917 |
| rs73670309  | 0.474 | 0.157 | 0.214 | 0.221 | 0.023 |
| rs740516    | 0.060 | 0.002 | 0.586 | 0.334 | 0.278 |
| rs740893    | 0.291 | 0.625 | 0.775 | 0.383 | 0.368 |
| rs74090351  | 0.164 | 0.376 | 0.867 | 0.188 | 0.492 |
| rs7475279   | 0.624 | 0.786 | 0.967 | 0.507 | 0.686 |
| rs7481219   | 0.972 | 0.843 | 0.841 | 0.837 | 0.718 |
| rs7484541   | 0.122 | 0.614 | 0.448 | 0.945 | 0.760 |
| rs75077113  | 0.010 | 0.094 | 0.486 | 0.476 | 0.655 |
| rs75130744  | 0.321 | 0.936 | 0.774 | 0.771 | 1.000 |
| rs7567544   | 0.783 | 0.706 | 0.417 | 0.149 | 0.498 |
| rs764029425 | 0.693 | 0.060 | 0.333 | 0.331 | 0.150 |
| rs76491020  | 0.975 | 0.301 | 0.602 | 0.683 | 0.525 |
| rs76767219  | 0.819 | 0.683 | 0.009 | 0.421 | 0.004 |
| rs768159759 | 0.134 | 0.070 | 0.982 | 0.179 | 0.593 |
| rs76895963  | 0.686 | 0.395 | 0.827 | 0.597 | 0.127 |
| rs7696472   | 0.010 | 0.019 | 0.207 | 0.586 | 0.931 |
| rs770971500 | 0.667 | 0.597 | 0.853 | 0.091 | 0.187 |
| rs771193934 | 0.015 | 0.840 | 0.021 | 0.836 | 0.900 |
| rs775181992 | 0.451 | 0.557 | 0.661 | 0.569 | 0.961 |
| rs778571122 | 0.943 | 0.339 | 0.453 | 0.575 | 0.004 |
| rs78057960  | 0.241 | 0.617 | 0.465 | 0.908 | 0.632 |
| rs781996653 | 0.595 | 0.055 | 0.340 | 0.513 | 0.008 |
| rs784504    | 0.762 | 0.969 | 0.884 | 0.497 | 0.866 |
| rs78890745  | 0.999 | 0.704 | 0.776 | 0.155 | 0.327 |
| rs79237700  | 0.942 | 0.524 | 0.992 | 0.788 | 0.824 |
| rs79287178  | 0.259 | 0.647 | 0.587 | 0.737 | 0.195 |
| rs79391862  | 0.527 | 0.132 | 0.554 | 0.440 | 0.665 |
| rs799157    | 0.147 | 0.750 | 0.941 | 0.883 | 0.045 |
| rs80126506  | 0.963 | 0.768 | 0.429 | 0.893 | 0.280 |

|            |       |       |       |       |       |
|------------|-------|-------|-------|-------|-------|
| rs80235628 | 0.750 | 0.453 | 0.066 | 0.946 | 0.119 |
| rs8027064  | 0.500 | 0.515 | 0.863 | 0.533 | 0.890 |
| rs8107967  | 0.383 | 0.292 | 0.163 | 0.547 | 0.417 |
| rs8176741  | 0.392 | 0.596 | 0.159 | 0.368 | 0.129 |
| rs8178824  | 0.062 | 0.517 | 0.408 | 0.187 | 0.167 |
| rs820504   | 0.011 | 0.568 | 0.049 | 0.473 | 0.599 |
| rs848476   | 0.296 | 0.183 | 0.196 | 0.795 | 0.544 |
| rs858519   | 0.011 | 0.754 | 0.824 | 0.270 | 0.189 |
| rs868655   | 0.111 | 0.412 | 0.253 | 0.897 | 0.208 |
| rs8756     | 0.039 | 0.188 | 0.546 | 0.018 | 0.000 |
| rs892225   | 0.263 | 0.773 | 0.145 | 0.686 | 0.365 |
| rs899865   | 0.039 | 0.154 | 0.790 | 0.305 | 0.310 |
| rs921153   | 0.088 | 0.799 | 0.626 | 0.033 | 0.503 |
| rs925098   | 0.793 | 0.614 | 0.400 | 0.445 | 0.068 |
| rs9366291  | 0.501 | 0.990 | 0.173 | 0.055 | 0.836 |
| rs9379084  | 0.102 | 0.119 | 0.831 | 0.208 | 0.007 |
| rs9426829  | 0.208 | 0.927 | 0.106 | 0.722 | 0.282 |
| rs9461793  | 0.456 | 0.318 | 0.197 | 0.408 | 0.083 |
| rs9556403  | 0.608 | 0.464 | 0.506 | 0.432 | 0.009 |
| rs9644032  | 0.445 | 0.765 | 0.206 | 0.967 | 0.285 |
| rs9697210  | 0.533 | 0.393 | 0.940 | 0.121 | 0.604 |
| rs9834503  | 0.579 | 0.720 | 0.971 | 1.000 | 0.771 |
| rs9872754  | 0.562 | 0.683 | 0.768 | 0.302 | 0.365 |
| rs9987289  | 0.986 | 0.717 | 0.570 | 0.362 | 0.001 |

---

**Supplementary Table 6.** Sex-specific associations of genetic predictors for SHBG with LDL-cholesterol and lipoprotein (a)

| Outcome         | Sex   | beta  | 95% CI      | <i>p</i> | MR Egger intercept <i>p</i> |
|-----------------|-------|-------|-------------|----------|-----------------------------|
| LDL-cholesterol | Men   | -0.06 | -0.15, 0.04 | 0.24     | 0.60                        |
|                 | Women | -0.05 | -0.12, 0.03 | 0.23     | 0.87                        |
| Lipoprotein (a) | Men   | -0.07 | -0.17, 0.04 | 0.21     | 0.43                        |
|                 | Women | -0.02 | -0.11, 0.07 | 0.67     | 0.88                        |

Inverse variance weighting was used in men and women because the MR Egger intercept *p* value does not indicate pleiotropy (intercept  $p > 0.05$ ).

**Supplementary Table S7.** Sex-specific associations of genetically predicted SHBG with ischemic heart disease in the UK Biobank excluding genetic variants related to BMI in univariable MR

| Outcome | Sex   | OR   | 95% CI     | <i>p</i>             | MR Egger intercept <i>p</i> |
|---------|-------|------|------------|----------------------|-----------------------------|
| IHD     | Men   | 0.79 | 0.71, 0.89 | $4.3 \times 10^{-5}$ | 0.48                        |
|         | Women | 0.93 | 0.78, 1.10 | 0.41                 | 0.04                        |

IHD, ischemic heart disease. 4 SNPs related to BMI in men and 2 SNPs related to BMI in women were excluded. Inverse variance weighting was used in men and MR Egger corrected estimates were used in women because the MR Egger intercept *p* value < 0.05.

**Supplemental Table S8.** Sex-specific associations of genetically predicted SHBG with ischemic heart disease in the UK Biobank using non-overlapping samples in the UK Biobank

| Outcome | Sex   | OR   | 95% CI     | <i>p</i>             | MR Egger intercept <i>p</i> |
|---------|-------|------|------------|----------------------|-----------------------------|
| IHD     | Men   | 0.79 | 0.71, 0.88 | $3.3 \times 10^{-5}$ | 0.52                        |
|         | Women | 0.93 | 0.78, 1.10 | 0.38                 | 0.02                        |

IHD, ischemic heart disease. Inverse variance weighting was used in men and MR Egger corrected estimates were used in women because the MR Egger intercept *p* value < 0.05.

## References

1. Ruth KS, Day FR, Tyrrell J, Thompson DJ, Wood AR, Mahajan A et al: Using human genetics to understand the disease impacts of testosterone in men and women. *Nat Med* 2020, 26(2):252-258.

## Supplementary Figure S1. Flow chart of the study design

### (a) Univariable Mendelian randomization

*Europeans*

Sex-specific genetic predictors for SHBG

↓  
Genetic association with ischemic heart disease  
in men and women

*Japanese*

Genetic predictors for SHBG in men

↓  
Genetic association with ischemic heart disease in men

### (b) Multivariable Mendelian randomization controlling for bioavailable testosterone in men

*Europeans*

Genetic predictors for SHBG and  
bioavailable testosterone in men

↓  
Genetic association with  
ischemic heart disease in men

## Supplementary Figure S2. Scatter plot on the genetic association with sex hormone binding globulin and with ischemic heart disease in men and women in the UK Biobank

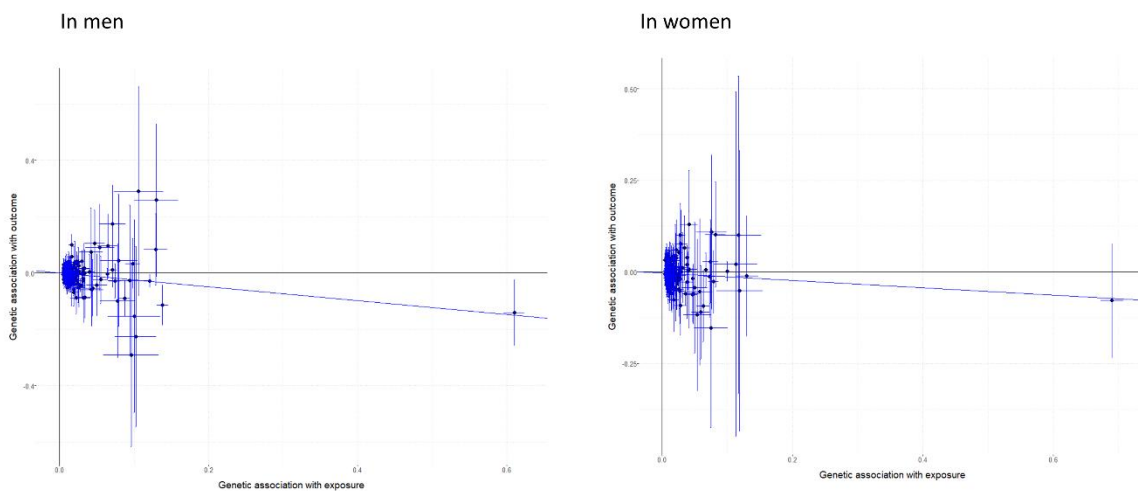



**Supplementary Figure S3.** Leave-one-out analysis on the sex-specific association of genetically predicted sex hormone binding globulin with ischemic heart disease in the UK Biobank

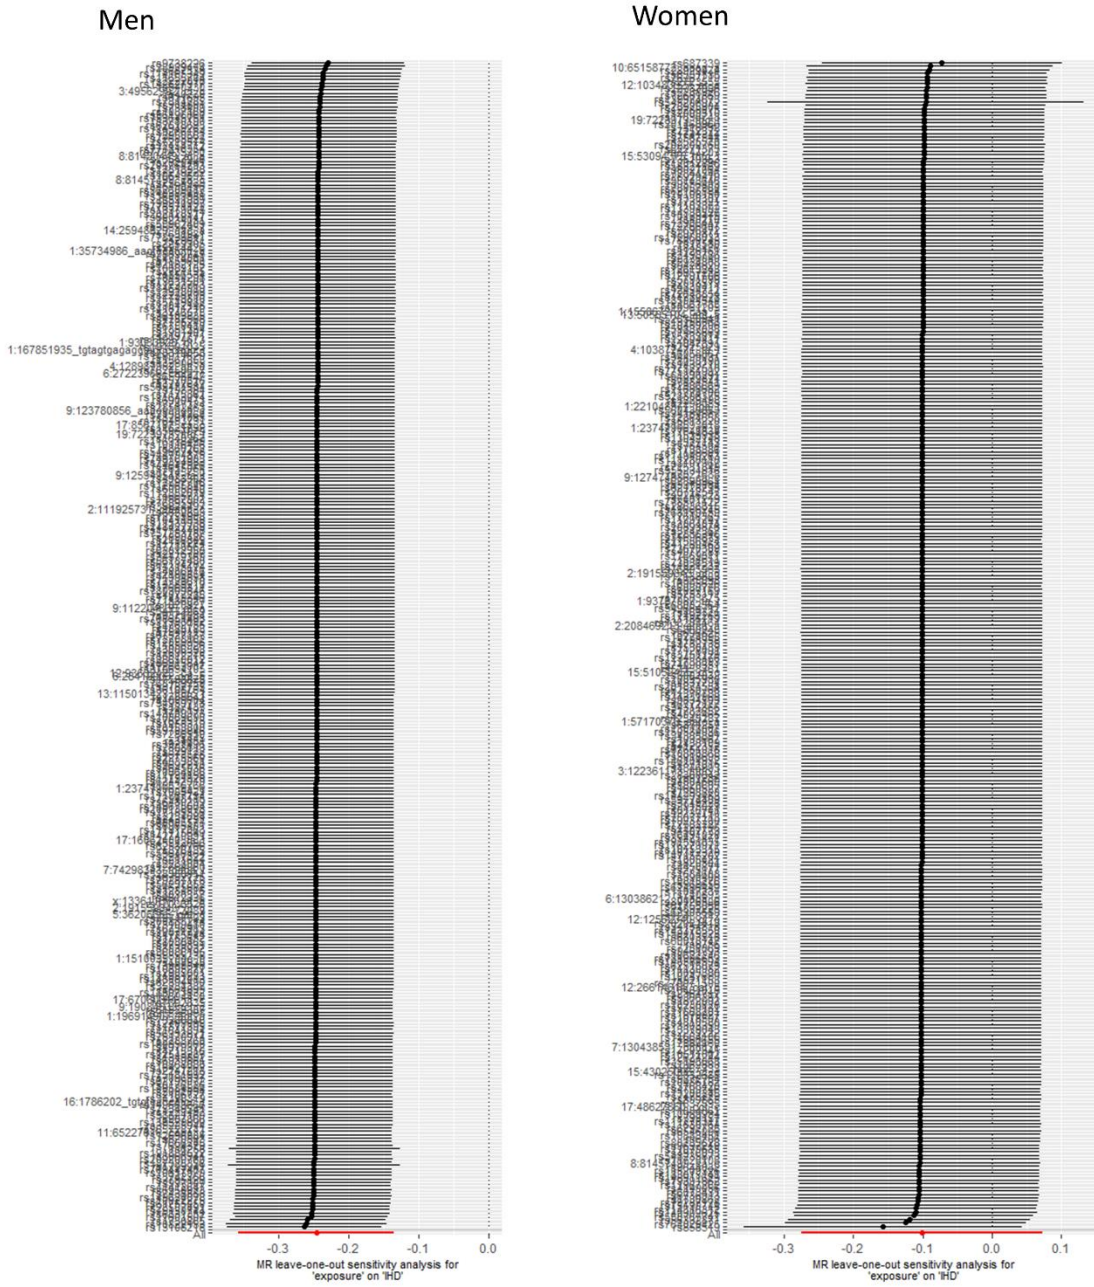

Supplement: 41598_2021_2510_MOESM2_ESM.pdf [file 41598_2021_2510_MOESM2_ESM.pdf]
